# Supplementary material for: Multi-omics, multi-tissue analysis reveal role of extracellular matrix remodeling and lipid transport dysfunction in edematous malnutrition (kwashiorkor)
Source: Research Square preprint supplement (doi:10.21203/rs.3.rs-8320069/v1), 2025-12-16
Supplement: Supplementary file 1 [file a27497b9dc9531f8b43259d3.xlsx]

## Sheet: Proteomics
Proteomics latent variable (pLV) membership
pLV1	pLV2	pLV3	pLV4	pLV5	pLV6	pLV7	pLV8	pLV9
LV140	A1AT	IGKC	ACTB, ACTG	A1AG1	HPT	GELS	APOC2	FIBG
KV105	AACT	IGHG1	CO7	ZA2G	C4BPB	LUM	APOC3	FIBA
HV374	LBP	IGHG1, IGG1	VIR	CO5	HPTR	TETN	APOC1	FIBB
KV311, KVD11	CRP	KV37	ANGT	PEDF	APOL1			FINC
LV147	SAA1	HV434, HV461, HVD82, HV431, HVD34, HV439, HV459, HV404, HV432	CPN2	A2GL	PROS
HV323	CO9	IGLL5	HBB
HV551	CD14	IGLC3
LV144	A2GL	IGHG2
LV319	CK5P2	IGLL1
KV112, KVD12	APOE	HVC05, HV333, HVC33
HV330, HVC05	ITIH3	IGG1
KV116	VWF	IGHA1
KV133, KVD33	CBG	CDC5L
HV315	FA10	KVD20
KVD15	ZPI	KV240, KVD40
HV108	A1AT, A1ATR	HV307
HV169	CERU
HVD82
KV108						A1AT	Alpha-1-antitrypsin
KV320						AACT	Alpha-1-antichymotrypsin
HV118						LBP	Lipopolysaccharide-binding protein
HV124						CRP	C-reactive protein
HV307						SAA1	Serum amyloid A-1 protein
HV102						CO9	Complement component C9
HV146						CD14	Monocyte differentiation antigen CD14
LV39						A2GL	Leucine-rich alpha-2-glycoprotein
KV139, KVD39						CK5P2	CDK5 regulatory subunit-associated protein 2
LV211						APOE	Apolipoprotein E
LV325						ITIH3	Inter-alpha-trypsin inhibitor heavy chain H3
HV364						VWF	von Willebrand factor
LV151						CBG	Corticosteroid-binding globulin
LV327						FA10	Coagulation factor X
HV309						ZPI	Protein Z-dependent protease inhibitor
HV692						A1AT, A1ATR	Alpha-1-antitrypsin-related protein
KV117						CERU	Ceruloplasmin
HV321
IGLL5

## Sheet: Lipidomics
Lipidomics latent variable (lLV) membership
lLV1	lLV2	lLV3	lLV4	lLV5	lLV6	lLV7	lLV8	lLV9	lLV10	lLV11	lLV12	lLV13	lLV14	lLV15	lLV16	lLV17	lLV18	lLV19	lLV20	lLV21
TG_(60:10)	TG_(57:8)	SM_(36:2)	PI_(38:4)	SM_(44:2)	FFA_(22:6)	PC-P_(40:6)	TG_(62:13)	PE-P_(40:2)	PG_(38:0)	LPE_(18:2)	PI_(40:5)	SM_(40:0)	PS_(36:2)_peak 1	TG_(62:14)	SM_(38:2)	PC-P_(36:4)	CE_(17:1)	PE_(38:2)	PA_(36:3)_(M+NH4)+	Carnitine_(14:0)
TG_(60:0)	SM_(44:2)	SM_(35:2)	PI_(38:2)	SM_(44:1)	FFA_(22:5)	PC-P_(40:5)	TG_(62:12)	PE-P_(38:3)	PG_(36:0)	LPE_(18:1)	PI_(40:4)	SM_(38:0)	Hex-Cer_(36:1-OH)	TG_(62:13)	SM_(36:2)			PE_(36:3)
TG_(59:4)	SM_(44:1)	SM_(34:2-OH)	PAF_(22:3)	SM_(44:0)	FFA_(22:4)	LysoPAF_(24:0)	SM_(32:1)	PE-P_(38:2)/PE-O_(38:3)	PG_(34:0)	FFA_(24:0)	PI_(38:4)	SM_(36:0)	GM3_(40:1) Gap Filling	TG_(62:12)	Cer_(45:1-OH)
TG_(59:3)	SM_(44:0)	SM_(34:2)	PAF_(22:0)	SM_(43:1)	FFA_(22:3)	CE_(22:6)	SM_(32:0)	PE-P_(38:1)	PE-P_(40:6)	FFA_(22:0)	PI_(36:4)*	SM_(34:0)	GM3_(36:1) Gap Filling	TG_(57:8)
TG_(58:9)	SM_(43:1)	SM_(33:1)	PAF_(20:1)/LPC_(22:1)	SM_(42:2)	FFA_(22:2)	Carnitine_(20:1)	SM_(30:0)	PE-P_(36:2)	PE-P_(40:4)	FFA_(21:0)	PI_(36:2)	SM_(33:0)	GD3_(36:1)
TG_(58:8)	SM_(42:2)	S_(41:0)	PAF_(20:0)/LPC_(22:0)	SM_(42:1)	FFA_(22:1)	Carnitine_(18:2)	PC-O_(30:0)	PE-P_(36:1)	PE-P_(38:4)	FFA_(20:0)	PI_(34:2)
TG_(58:7)	SM_(41:1)	S_(36:1)	PAF_(18:1)/LPC_(20:1)	SM_(42:0)	FFA_(20:4)	Carnitine_(18:1)	PC_(34:4)	PE-P_(35:2)	PE-P_(37:4)	Carnitine_(22:0)	PI_(34:1)
TG_(58:6)	SM_(41:0)	PS_(40:6)	PAF_(18:0)/LPC_(20:0)	SM_(41:1)	FFA_(20:3)	Carnitine_(18:0)	PC_(32:2)	PE-P_(35:1)	PE-P_(36:4)		PI_(32:1)
TG_(58:5)	SM_(40:2)	PS_(37:3)	PAF_(17:0)/LPC_(19:0)	SM_(41:0)	FFA_(20:2)	Carnitine_(16:0)	PC_(31:0)	PE-P_(34:2)	PE-P_(36:3)		GD1a_(36:0)
TG_(58:4)	SM_(40:1)	PS_(35:2)_Gap filling	PAF_(15:1)/LPC_(17:1)	SM_(40:2)	FFA_(20:1)	Carnitine_(14:1)	PC_(30:1)	PE-P_(34:1)	PE-P_(34:2)
TG_(58:3)	SM_(39:1)	PI_(35:2)	PAF_(15:0)/LPC_(17:0)	SM_(40:1)	FFA_(20:0)	Carnitine_(12:1)	PC_(30:0)	PE-P_(34:0)	PE-O_(36:4)
TG_(58:2)	SM_(39:0)	PG_(36:3)	PAF_(14:0)/LPC_(16:0)	SM_(40:0)	FFA_(19:0)	Carnitine_(10:1)	PC_(29:0)	PE-P_(32:0)	PAF_(12:0)/LPC_(14:0)
TG_(58:11)	SM_(38:3)	PG_(36:2)	PAF_(13:0)/LPC_(15:0)	SM_(39:1)	FFA_(18:3)	Carnitine_(10:0)	PC_(28:0)	PE-O_(38:2)	PA_(40:4)
TG_(58:10)	SM_(38:1)	PG_(36:1)	PAF_(12:0)/LPC_(14:0)	SM_(38:2)	FFA_(18:2)	Carnitine_(02:0)	PA_(37:4)_(M+NH4)+	PE-O_(36:2)	PA_(40:3)
TG_(58:1)	SM_(37:2)	PE-P_(40:6)	LysoPAF_(24:0)	SM_(38:1)	FFA_(18:1)		FFA_(14:0)	PE-O_(36:1)	PA_(38:3)
TG_(57:7)	SM_(36:1)	PE-P_(40:5)	LysoPAF_(22:0)	SM_(37:2)	FFA_(18:0)		Cer_(32:1)	PA_(38:1)_Gap filling
TG_(57:4)	SM_(36:0-OH)	PE-P_(40:2)	LysoPAF_(20:3)	SM_(35:1)	FFA_(17:1)			Hex-Cer_(34:1-OH)
TG_(57:3)	SM_(35:2)	PE-P_(38:2)/PE-O_(38:3)	LysoPAF_(20:0)	S_(34:2) Gap filling	FFA_(16:1)
TG_(57:2)	SM_(34:2-OH)	PE-P_(38:1)	LysoPAF_(18:2)	PC-O_(37:1)	FFA_(16:0)
TG_(56:8)	SM_(34:2)	PE-P_(36:2)	LysoPAF_(18:1)	PAF_(22:3)	FFA_(14:0)
TG_(56:7)	SM_(34:1-OH)	PE-P_(36:1)	LysoPAF_(18:0)	PAF_(22:0)	Carnitine_(12:1)
TG_(56:6)	SM_(34:1)	PE-P_(34:1)	LysoPAF_(16:1)	PAF_(20:0)/LPC_(22:0)	Carnitine_(04:0-OH)
TG_(56:5)	SM_(34:0)	PE-P_(34:0)	LysoPAF_(16:0)	LysoPAF_(24:0)	Carnitine_(02:0)
TG_(56:4)	SM_(33:1)	PE-O_(40:5)	LPI_(20:4)	Hex-Cer_(42:0-OH)
TG_(56:3)	SM_(33:0)	PE-O_(39:1)	LPI_(18:2)	Hex-Cer_(41:0-OH)
TG_(56:2)	SM_(32:1)	PE-O_(38:2)	LPI_(18:1)	Hex-Cer_(40:0-OH)
TG_(56:1)	SM_(32:0)	PE-O_(37:0)	LPE_(20:5)	Hex-Cer_(39:0-OH)
TG_(55:6)	PS_(40:6)	PE-O_(36:2)	LPE_(18:2)	GD3_(42:1)
TG_(55:5)	PS_(40:1)	PE-O_(36:1)	LPE_(18:1)	CE_(22:6)
TG_(55:4)	PS_(38:4)	PE-O_(34:1)	LPE_(18:0)	CE_(20:5)
TG_(55:3)	PS_(38:1)	PE_(40:5)	LPE_(17:0)	CE_(20:4)
TG_(54:6)	PS_(35:0)	PE_(38:5)	LPE_(16:1)	CE_(18:3)
TG_(54:5)	PI_(40:6)	PE_(38:4)	LPE_(16:0)	CE_(16:2)
TG_(54:4)	PI_(37:4)	PE_(38:3)	LPC_(22:6)
TG_(54:3)	PI_(35:2)	PE_(38:2)	LPC_(22:5)
TG_(54:2)	PI_(32:0)	PE_(38:1)_Gap Filling	LPC_(22:4)
TG_(54:1)	PG_(40:0)	PE_(36:5)	LPC_(22:3)
TG_(54:0)	PG_(38:0)	PE_(36:4)	LPC_(20:5)
TG_(53:5)	PG_(36:3)	PE_(36:3)	LPC_(20:4)_2 Peaks
TG_(53:4)	PE-P_(40:6)	PE_(36:2)	LPC_(20:3)
TG_(53:3)	PE-P_(40:5)	PE_(36:1)	LPC_(18:4)
TG_(53:2)	PE-P_(40:4)	PE_(35:2)	LPC_(18:3)
TG_(53:1)	PE-P_(39:4)	PE_(35:1)	LPC_(18:2)
TG_(52:5)	PE-P_(38:4)	PE_(34:3)_2nd peak	LPC_(18:1)
TG_(52:4)	PE-P_(38:3)	PE_(34:3)_1st peak	LPC_(18:0)
TG_(52:3)	PE-P_(36:4)	PE_(34:2)	LPC_(16:1)
TG_(52:2)	PE-P_(34:1)	PE_(34:1)	Hex-Sph_(18:1)
TG_(52:1)	PE-P_(34:0)	PE_(32:1)	GD3_(36:1)
TG_(51:5)	PE-O_(40:5)	PC_(42:3)	GD3_(34:1)
TG_(51:4)	PC-P_(40:6)	PC_(40:2)	GD1a_(34:1)
TG_(51:3)	PC-P_(40:5)	PC_(38:2)
TG_(51:2)	PC-P_(40:4)	PC_(38:1)
TG_(51:1)	PC-P_(40:3)	PC_(37:2)
TG_(50:5)	PC-P_(38:4)	PC_(37:1)
TG_(50:4)	PC-P_(38:3)	PC_(36:5)
TG_(50:3)	PC-P_(36:3)	PC_(36:3)
TG_(50:2)	PC-P_(36:2)	PC_(36:2)
TG_(50:1)	PC-P_(36:1)	PC_(36:1)
TG_(50:0)	PC-P_(34:2)	PC_(35:3)
TG_(49:4)	PC-P_(34:1)	PC_(35:2)
TG_(49:3)	PC-P_(34:0)	PC_(35:1)
TG_(48:6)	PC-P_(32:0)	PC_(35:0)
TG_(48:5)	PC-O_(40:6)	PC_(34:3)
TG_(48:4)	PC-O_(40:5)	PC_(34:2)
TG_(48:3)	PC-O_(40:4)	PC_(34:1)
TG_(48:2)	PC-O_(40:3)	PC_(33:2)
TG_(48:1)	PC-O_(40:2)	PC_(33:1)
TG_(46:4)	PC-O_(40:1)	PC_(32:2)
TG_(46:3)	PC-O_(38:3)	PC_(32:1)
TG_(46:2)	PC-O_(38:2)	PC_(31:1)
TG_(46:1)	PC-O_(38:0)	PC_(30:1)
TG_(44:2)	PC-O_(37:1)	PA_(40:7)
TG_(44:1)	PC-O_(36:3)	PA_(40:6)
TG_(42:2)	PC-O_(36:2)	PA_(40:2)
TG_(42:1)	PC-O_(36:1)	PA_(38:6)
TG_(24:0)_(M+H)+	PC-O_(36:0)	PA_(38:4)_(M+NH4)+
S_(42:1-OH)	PC-O_(34:2)	PA_(38:2)_Gap filling
S_(34:0)	PC-O_(34:1)	PA_(38:1)_Gap filling
PE-P_(40:0)	PC-O_(34:0)	PA_(37:4)_(M+NH4)+
PE-P_(34:0)	PC-O_(33:0)	PA_(36:4)
PE-P_(32:0)	PC-O_(32:1)	PA_(36:3)_(M+NH4)+
PE_(34:0)	PC-O_(32:0)	Mono-lyso_CL_(53:01)
PC_(40:0)	PC-O_(31:0)	LPE_(18:0)
MG_(22:6)_(M+Na)+	PC-O_(30:0)	Lacto-cer_(42:2)
MG_(20:4)_(M+Na)+	PC_(42:4)	Lacto-cer_(42:1)
MG_(20:2)	PC_(42:3)	Hex-Cer_(42:2)
MG_(20:1)	PC_(42:2)	Hex-Cer_(42:1)
MG_(18:2)	PC_(42:1)	Hex-Cer_(41:2)
MG_(18:1)	PC_(40:6)	Hex-Cer_(41:1)
DG_(42:6)	PC_(40:5)	Hex-Cer_(40:1)
DG_(40:4)	PC_(40:4)	Hex-Cer_(38:0-OH)
DG_(40:1)_(M+H)+	PC_(40:3)	Hex-Cer_(37:1)_(M+Na)+
DG_(38:3)_(M+Na)+	PC_(40:2)	Hex-Cer_(35:2)
DG_(38:2)	PC_(40:1)	Hex-Cer_(35:0-OH)
DG_(38:1)_(M+Na)+	PC_(40:0)	Hex-Cer_(35:0)
DG_(38:1)_(M+H)+	PC_(38:6)	GB4_(34:1)
DG_(36:3)	PC_(38:5)	GB3_(42:1)
DG_(36:2)	PC_(38:4)	GB3_(34:1)
DG_(35:2)_(M+Na)+	PC_(38:3)	FFA_(24:1)
DG_(35:2)_(M+K)+	PC_(38:2)	CPE_(44:0)
DG_(35:1)_(M+Na)+	PC_(38:1)	CPE_(42:2)
DG_(34:2)	PC_(37:2)	CPE_(42:1)
DG_(34:1)	PC_(37:1)	CPE_(40:2)
DG_(33:1)	PC_(36:5)	CPE_(40:1)
DG_(33:1)	PC_(36:4)	CPE_(34:2)
CPE_(41:0)	PC_(36:3)	CPE_(34:1)
CE_(18:2)	PC_(36:2)	Cer_(44:2)
CE_(18:1)	PC_(36:1)	Cer_(44:1)
CE_(18:0)	PC_(36:0)	Cer_(44:0)
CE_(16:0)	PC_(35:4)	Cer_(43:2)
CE_(02:0)	PC_(35:3)	Cer_(43:1)
	PC_(35:2)	Cer_(42:3)
	PC_(35:1)	Cer_(42:2)
	PC_(35:0)	Cer_(42:1-OH)
	PC_(34:4)	Cer_(42:1)
	PC_(34:3)	Cer_(42:0-OH)
	PC_(34:2)	Cer_(42:0)
	PC_(34:1)	Cer_(41:2)
	PC_(34:0)	Cer_(41:1)
	PC_(33:2)	Cer_(41:0-OH)
	PC_(33:1)	Cer_(41:0)
	PC_(32:2)	Cer_(40:2)
	PC_(32:1)	Cer_(40:1)
	PC_(32:0)	Cer_(40:0-OH)
	PC_(31:1)	Cer_(40:0)
	PC_(31:0)	Cer_(39:1)
	PC_(30:0)	Cer_(38:2)
	PC_(29:0)	Cer_(38:1)
	PC_(28:0)	Cer_(38:0)
	PA_(40:5)	Cer_(36:1)
	PA_(40:3)	Cer_(32:1)
	PA_(40:2)
	PA_(38:4)_(M+NH4)+
	PA_(38:2)_Gap filling
	PA_(38:1)_Gap filling
	PA_(37:4)_(M+NH4)+
	Lacto-cer_(42:2)
	Lacto-cer_(42:1)
	Lacto-cer_(40:1)
	Lacto-cer_(38:1)
	Lacto-cer_(38:0)
	Lacto-cer_(34:1-OH)
	Lacto-cer_(34:1)
	Hex-Cer_(42:2-OH)
	Hex-Cer_(42:2)
	Hex-Cer_(42:1)
	Hex-Cer_(42:0-OH)
	Hex-Cer_(41:2)
	Hex-Cer_(41:1)
	Hex-Cer_(41:0-OH)
	Hex-Cer_(40:2)
	Hex-Cer_(40:1)
	Hex-Cer_(40:0-OH)
	Hex-Cer_(40:0)
	Hex-Cer_(39:0-OH)
	Hex-Cer_(38:0-OH)
	Hex-Cer_(38:0)
	Hex-Cer_(37:1)_(M+Na)+
	Hex-Cer_(35:2)
	Hex-Cer_(35:1)
	Hex-Cer_(35:0-OH)
	Hex-Cer_(35:0)
	Hex-Cer_(34:1)
	GM3_(34:1)
	GB4_(42:2)
	GB4_(42:1)
	GB4_(34:1)
	GB3_(42:1)
	GB3_(34:1)
	FFA_(24:1)
	Cer_(44:1)
	Cer_(43:1)
	Cer_(42:1-OH)
	Cer_(42:1)
	Cer_(42:0-OH)
	Cer_(42:0)
	Cer_(41:2)
	Cer_(41:1)
	Cer_(41:0-OH)
	Cer_(41:0)
	Cer_(40:1)
	Cer_(40:0-OH)
	Cer_(40:0)
	Cer_(39:1)
	Cer_(38:1)
	Cer_(38:0)
	Cer_(36:1)
	CE_(18:0)

## Sheet: Metabolomics
Metabolomics latent variable (mLV) membership
showing: mode(rt_m/z)
mLV1	mLV2	mLV3	mLV4	mLV5	mLV6	mLV7	mLV8	mLV9	mLV10	mLV11	mLV12	mLV13	mLV14	mLV15	mLV16
POS(0.04_279.0921)	POS(0.04_279.0921)	POS(1.87_96.9955)	NEG(0.89_136.948)	POS(0.85_130.0855)	NEG(11.87_339.1986)	POS(1.23_155.0439)	POS(11.24_191.145)	POS(0.33_130.9653)	POS(1.03_132.0756)	POS(1.24_130.0851)	NEG(1.08_275.0546)	NEG(10.87_311.2213)	NEG(6.18_627.3742)	POS(1.5_137.045)	POS(0.78_186.8995)
POS(0.07_194.116)	POS(0.07_194.116)	POS(10.01_305.1607)	NEG(0.97_320.884)	POS(0.85_299.0385)	NEG(14.21_759.061)	POS(1.24_267.0573)	POS(11.37_163.111)	POS(0.33_195.9106)	POS(1.03_90.0541)	POS(10.25_351.2122)	NEG(1.11_213.0826)	NEG(6.12_514.2835)	POS(0.37_279.0921)	POS(1.5_380.9943)	POS(0.89_177.0598)
POS(0.15_218.9275)	POS(0.15_218.9275)	POS(10.06_255.1915)	NEG(1.05_174.9209)	POS(0.85_84.0799)	NEG(14.38_183.0667)	POS(1.5_114.9963)	POS(11.42_113.1294)	POS(0.35_115.9633)	POS(1.04_176.0389)	POS(10.28_277.2148)	NEG(1.13_145.097)	NEG(6.12_514.359)	POS(0.76_279.0921)	POS(1.5_399.0078)	POS(0.89_191.0755)
POS(0.2_96.0774)	POS(0.2_96.0774)	POS(10.12_327.2126)	NEG(1.13_317.0331)	POS(0.86_116.0695)	NEG(14.42_183.074)	POS(1.5_216.0854)	POS(11.5_107.069)	POS(0.35_190.9339)	POS(1.2_261.0929)	POS(10.28_379.1807)	NEG(1.25_203.019)	NEG(6.47_400.2841)	POS(1.52_230.9799)	POS(1.51_389.0182)	POS(0.9_327.0501)
POS(0.77_218.8652)	POS(0.33_130.9653)	POS(10.12_387.2698)	NEG(1.15_996.8225)	POS(0.86_175.1175)	NEG(14.44_184.0524)	POS(1.5_229.1534)	POS(11.5_135.1157)	POS(0.37_128.9497)	POS(1.24_267.0573)	POS(10.74_621.4181)	NEG(1.32_127.0194)	NEG(6.47_448.3056)	POS(10.71_357.2772)	POS(1.51_423.0068)	POS(0.92_336.0135)
POS(0.79_232.9193)	POS(0.33_195.9106)	POS(10.13_199.1679)	NEG(1.16_588.8973)	POS(0.86_237.0679)	NEG(14.45_183.0108)	POS(1.51_113.0058)	POS(11.5_360.3221)	POS(0.39_55.9341)	POS(1.24_84.0799)	POS(11.01_401.2996)	NEG(1.34_323.0779)	NEG(6.47_464.4821)	POS(11.4_319.2232)	POS(1.52_181.9896)	POS(0.95_158.9633)
POS(0.79_69.0119)	POS(0.35_190.9339)	POS(10.13_308.1949)	NEG(1.17_248.9591)	POS(0.86_285.0227)	NEG(14.45_325.2376)	POS(1.51_169.0051)	POS(11.53_153.1259)	POS(0.44_151.921)	POS(1.29_145.0485)	POS(11.44_313.1535)	NEG(1.5_294.8213)	NEG(6.47_465.381)	POS(11.42_422.2926)	POS(10.71_357.2772)	POS(0.95_226.9507)
POS(0.8_170.9267)	POS(0.37_128.9497)	POS(10.13_371.2387)	NEG(1.17_962.829)	POS(0.86_301.0003)	NEG(14.46_205.1583)	POS(1.51_241.1531)	POS(11.55_357.1456)	POS(0.49_167.9159)	POS(1.29_204.122)	POS(11.58_313.1534)	NEG(1.52_343.9936)	NEG(6.47_466.2521)	POS(11.44_350.2288)	POS(10.86_133.085)	POS(0.95_226.997)
POS(0.8_86.9629)	POS(0.37_279.0921)	POS(10.15_415.2644)	NEG(1.18_316.9467)	POS(0.86_373.0429)	NEG(14.47_117.0334)	POS(1.53_135.0424)	POS(11.57_109.1001)	POS(0.65_131.9288)	POS(1.29_204.1656)	POS(5.61_96.9811)	NEG(2.04_243.0607)	NEG(6.47_466.3079)	POS(11.53_359.2533)	POS(10.86_357.314)	POS(0.95_227.0329)
POS(0.81_110.0077)	POS(0.39_55.9341)	POS(10.16_132.0795)	NEG(1.18_317.0007)	POS(0.86_428.9965)	NEG(14.47_170.003)	POS(1.58_170.011)	POS(11.57_210.1086)	POS(0.72_166.9574)	POS(1.29_204.2019)	POS(5.95_488.2978)	NEG(2.08_107.0487)	NEG(6.47_532.2876)	POS(11.55_343.2209)	POS(10.86_85.1003)	POS(0.95_362.9256)
POS(0.81_124.9385)	POS(0.44_151.921)	POS(10.25_351.2122)	NEG(1.18_384.9342)	POS(0.86_70.0644)	NEG(14.47_183.0828)	POS(1.59_167.9956)	POS(11.58_155.1053)	POS(0.74_194.9521)	POS(1.29_60.0804)	POS(5.96_157.1)	NEG(2.08_248.0522)	NEG(6.47_534.2714)	POS(11.58_301.0736)	POS(11.32_256.3486)	POS(0.95_430.9768)
POS(0.81_140.9158)	POS(0.49_167.9159)	POS(10.28_159.1154)	NEG(1.18_384.9961)	POS(0.87_389.0204)	NEG(14.48_183.0662)	POS(1.59_249.9913)	POS(11.6_128.1059)	POS(0.77_113.9625)	POS(1.29_85.0277)	POS(5.96_158.0802)	NEG(2.08_383.1211)	NEG(6.47_547.223)	POS(11.6_256.3471)	POS(11.48_374.3012)	POS(0.95_498.9012)
POS(0.81_154.9494)	POS(0.72_166.9574)	POS(10.29_338.2364)	NEG(1.18_452.922)	POS(0.89_177.0598)	NEG(14.48_297.1133)	POS(1.61_61.0103)	POS(11.62_232.1679)	POS(0.77_141.9575)	POS(1.36_252.9866)	POS(5.96_165.0689)	NEG(2.08_405.103)	NEG(6.47_549.2668)	POS(11.6_371.1645)	POS(11.51_125.1313)	POS(0.95_566.8891)
POS(0.81_154.9666)	POS(0.74_194.9521)	POS(10.3_291.1916)	NEG(1.18_520.9097)	POS(0.89_191.0755)	NEG(14.49_133.0647)	POS(1.63_126.011)	POS(11.63_165.089)	POS(0.77_56.9418)	POS(1.37_142.0851)	POS(5.96_167.0841)	NEG(2.12_281.9728)	NEG(6.47_564.2254)	POS(11.63_333.2335)	POS(11.54_361.267)	POS(0.95_634.8765)
POS(0.81_157.8956)	POS(0.76_279.0921)	POS(10.3_316.1851)	NEG(1.18_656.8847)	POS(0.9_313.0343)	NEG(14.56_195.0625)	POS(1.76_176.0644)	POS(11.64_287.1988)	POS(0.78_111.9674)	POS(1.37_206.9812)	POS(5.96_183.1156)	NEG(2.25_198.0723)	NEG(6.47_951.5926)	POS(11.67_365.2278)	POS(11.58_125.0949)	POS(0.95_770.8517)
POS(0.81_182.9614)	POS(0.77_113.9625)	POS(10.31_357.2781)	NEG(1.18_928.8352)	POS(0.9_327.0501)	NEG(14.57_293.1774)	POS(1.77_135.029)	POS(11.73_175.1143)	POS(0.78_141.9823)	POS(1.37_268.9587)	POS(5.96_209.1313)	NEG(2.25_219.982)	NEG(6.48_465.4181)	POS(11.71_293.2069)	POS(12_256.2629)	POS(0.95_804.8439)
POS(0.81_183.002)	POS(0.77_141.9575)	POS(10.45_306.2384)	NEG(1.19_894.8416)	POS(0.9_531.0131)	NEG(14.57_311.098)	POS(1.81_137.0448)	POS(11.74_273.166)	POS(0.78_230.8886)	POS(1.37_346.9681)	POS(5.96_216.1477)	NEG(2.25_260.0437)	NEG(6.48_502.2471)	POS(11.71_335.2542)	POS(12_329.2125)	POS(0.95_838.8391)
POS(0.81_183.0239)	POS(0.77_218.8652)	POS(10.51_318.2385)	NEG(1.2_112.9844)	POS(0.92_922.8845)	NEG(14.58_297.1128)	POS(1.81_291.0686)	POS(11.79_138.0553)	POS(0.79_258.8877)	POS(1.38_224.9686)	POS(5.96_225.6184)	NEG(2.33_186.9912)	NEG(6.48_530.2427)	POS(11.71_361.2315)	POS(12_355.2802)	POS(0.95_872.8313)
POS(0.81_186.9198)	POS(0.77_70.9411)	POS(10.57_350.2286)	NEG(1.2_306.918)	POS(0.93_854.8962)	NEG(14.58_309.1723)	POS(1.84_216.0308)	POS(11.79_187.1171)	POS(0.81_203.9194)	POS(1.38_388.9858)	POS(5.96_234.6238)	NEG(3.01_103.0388)	NEG(6.48_533.2067)	POS(11.73_445.313)	POS(12_537.3947)	POS(0.95_898.8371)
POS(0.81_190.9099)	POS(0.78_111.9674)	POS(10.58_319.224)	NEG(1.2_308.9152)	POS(0.95_582.8621)	NEG(14.58_325.1418)	POS(1.85_156.9792)	POS(11.8_163.0734)	POS(1.08_219.0166)	POS(1.4_152.0082)	POS(5.96_236.1601)	NEG(3.01_229.0673)	NEG(6.48_594.2588)	POS(11.74_144.9811)		POS(0.95_90.976)
POS(0.81_200.9715)	POS(0.78_156.8884)	POS(10.59_188.6469)	NEG(1.2_374.9054)	POS(0.95_650.8493)	NEG(14.58_325.2375)	POS(1.88_170.0111)	POS(11.8_235.129)	POS(1.11_279.0919)	POS(1.43_98.0339)	POS(5.96_243.629)	NEG(3.36_144.0443)	NEG(6.48_600.2748)	POS(11.74_335.2174)		POS(0.95_906.8264)
POS(0.81_203.9194)	POS(0.78_186.8995)	POS(10.6_291.1335)	NEG(1.2_442.8931)	POS(0.95_778.8364)	NEG(14.58_325.2585)	POS(1.97_218.1374)	POS(11.82_219.1724)	POS(1.17_86.0594)	POS(1.49_126.0288)	POS(5.96_252.6342)	NEG(3.38_143.9874)	NEG(6.49_532.358)	POS(11.74_379.3036)		POS(0.95_907.3256)
POS(0.81_219.8978)	POS(0.78_230.8886)	POS(10.63_293.2063)	NEG(1.2_578.8686)	POS(0.95_812.831)	NEG(14.58_337.2035)	POS(1.98_159.064)	POS(11.83_124.0731)	POS(1.21_144.9799)	POS(1.49_141.0399)	POS(5.96_337.2517)	NEG(3.38_164.0705)	NEG(6.49_532.4023)	POS(11.75_277.2136)		POS(0.95_940.8188)
POS(0.81_284.8794)	POS(0.79_202.892)	POS(10.64_339.213)	NEG(1.21_170.9431)	POS(0.95_846.824)	NEG(14.59_183.0509)	POS(10.49_391.1502)	POS(11.83_267.1198)	POS(1.21_282.118)	POS(1.49_169.0348)	POS(5.96_412.2841)	NEG(3.39_113.9764)	NEG(6.61_448.3057)	POS(11.76_335.2788)		POS(0.95_975.8158)
POS(0.81_328.8963)	POS(0.79_232.9193)	POS(10.68_159.1154)	NEG(1.21_238.9304)	POS(0.95_854.8119)	NEG(14.59_183.989)	POS(10.82_489.3394)	POS(11.84_293.1344)	POS(1.23_155.0439)	POS(1.49_361.0223)	POS(5.96_412.3515)	NEG(3.39_124.9926)	NEG(7.99_498.2887)	POS(11.76_385.2541)		POS(0.96_91.0039)
POS(0.81_398.9035)	POS(0.79_69.0119)	POS(10.7_204.1368)	NEG(1.21_240.9276)	POS(0.96_122.9235)	NEG(14.59_297.1515)	POS(10.85_313.2336)	POS(11.87_249.1083)	POS(1.29_198.939)	POS(1.5_216.0854)	POS(5.96_412.3913)	NEG(3.39_134.0027)	NEG(7.99_531.299)	POS(11.77_315.1848)		POS(0.97_219.0815)
POS(0.81_400.9001)	POS(0.8_170.9267)	POS(10.71_371.2381)	NEG(1.21_296.8891)	POS(0.96_322.8853)	NEG(14.59_311.1265)	POS(10.86_357.3651)	POS(11.88_177.0776)	POS(1.31_175.9182)	POS(1.5_229.1534)	POS(5.96_76.0386)	NEG(3.39_147.044)	NEG(8.01_498.3629)	POS(11.77_381.2224)		POS(0.97_422.8812)
POS(0.81_442.8769)	POS(0.8_69.0149)	POS(10.72_235.1677)	NEG(1.21_298.8862)	POS(0.96_866.7851)	NEG(14.59_311.1672)	POS(10.87_380.334)	POS(11.91_305.159)	POS(1.31_316.9832)	POS(1.5_230.1844)	POS(5.97_105.0692)	NEG(3.39_163.9581)	NEG(8.24_407.2788)	POS(11.78_361.2695)		POS(0.97_556.8596)
POS(0.81_66.0183)	POS(0.8_86.9629)	POS(10.76_256.3474)	NEG(1.21_364.8766)	POS(0.97_219.0815)	NEG(14.59_327.1637)	POS(11.44_97.9412)	POS(11.92_107.0844)	POS(1.34_193.9281)	POS(1.5_399.0078)	POS(7.65_355.2622)	NEG(3.39_164.1088)	NEG(8.35_435.3103)	POS(11.79_307.1863)		POS(0.99_364.9148)
POS(0.81_68.9815)	POS(0.81_110.0077)	POS(10.77_283.2636)	NEG(1.21_510.8807)	POS(0.98_149.9897)	NEG(14.59_339.1984)	POS(2.1_161.0308)	POS(11.92_172.1115)	POS(1.34_212.9979)	POS(1.5_55.0288)	POS(7.81_133.1)	NEG(3.39_168.9824)	NEG(8.35_532.236)	POS(11.79_317.2024)		POS(1.06_160.0339)
POS(0.81_82.013)	POS(0.81_112.9772)	POS(10.77_299.1377)	NEG(1.23_286.8602)	POS(0.99_130.0955)	NEG(14.59_679.3132)	POS(2.11_293.073)	POS(11.92_263.1926)	POS(1.34_267.0017)	POS(1.51_189.0744)	POS(7.81_161.1312)	NEG(3.39_232.0574)	NEG(8.36_386.3048)	POS(11.8_279.1936)		POS(1.08_244.0775)
POS(0.82_126.9715)	POS(0.81_124.9385)	POS(10.78_267.1554)	NEG(1.24_442.6758)	POS(0.99_171.1479)	NEG(14.6_116.9488)	POS(2.26_173.0772)	POS(11.92_81.0691)	POS(1.34_375.0098)	POS(1.51_241.1531)	POS(7.81_239.1777)	NEG(3.39_252.0443)	NEG(8.36_450.2591)	POS(11.8_395.2383)		POS(1.12_150.9965)
POS(0.82_172.9326)	POS(0.81_140.9158)	POS(10.78_305.2072)	NEG(1.24_500.6347)	POS(0.99_175.1176)	NEG(14.6_130.9651)	POS(2.68_305.0843)	POS(11.92_86.0594)	POS(1.35_169.0945)	POS(1.51_248.148)	POS(7.82_119.0844)	NEG(3.39_261.0446)	NEG(8.36_486.1949)	POS(11.82_279.0922)		POS(1.16_226.896)
POS(0.82_183.037)	POS(0.81_154.9494)	POS(10.84_273.2406)	NEG(1.24_502.6317)	POS(0.99_191.0392)	NEG(14.6_147.9147)	POS(2.69_194.1045)	POS(11.92_91.0533)	POS(1.36_252.9866)	POS(1.52_124.0384)	POS(7.82_121.1)	NEG(3.39_263.995)	NEG(8.36_584.2805)	POS(11.83_341.2275)		POS(1.21_144.9799)
POS(0.82_222.9054)	POS(0.81_154.9666)	POS(10.84_297.239)	NEG(1.24_560.5908)	POS(0.99_248.9973)	NEG(14.6_158.9302)	POS(2.71_247.1261)	POS(11.93_119.0844)	POS(1.36_288.977)	POS(1.61_243.0825)	POS(7.82_129.0682)	NEG(3.39_278.0508)	NEG(8.36_919.6027)	POS(11.85_347.2538)		POS(1.23_162.0489)
POS(0.82_238.9184)	POS(0.81_157.8956)	POS(10.84_341.2655)	NEG(1.24_564.5849)	POS(0.99_308.9532)	NEG(14.6_174.9215)	POS(2.71_367.1484)	POS(11.93_133.0997)	POS(1.36_304.953)	POS(1.84_183.9623)	POS(7.82_143.0842)	NEG(3.39_284.0008)	NEG(8.37_448.3059)	POS(11.87_453.2813)		POS(1.23_306.8521)
POS(0.82_240.9195)	POS(0.81_182.9614)	POS(10.84_385.2915)	NEG(1.24_794.423)	POS(0.99_60.0552)	NEG(14.6_175.9094)	POS(2.78_211.1061)	POS(11.93_147.1155)	POS(1.37_206.9812)	POS(1.87_126.9959)	POS(7.82_145.1001)	NEG(3.39_294.0282)	NEG(8.37_448.3756)	POS(11.89_293.282)		POS(1.24_202.037)
POS(0.82_284.9237)	POS(0.81_183.002)	POS(10.85_314.3292)	NEG(1.24_796.4203)	POS(0.99_84.0436)	NEG(14.6_192.9283)	POS(2.88_176.0417)	POS(11.93_161.131)	POS(1.37_211.0028)	POS(1.87_147.0015)	POS(7.82_147.1156)	NEG(3.39_351.1311)	NEG(8.37_448.4486)	POS(11.91_305.159)		POS(1.24_267.0573)
POS(0.82_315.8664)	POS(0.81_183.0239)	POS(10.86_107.0702)	NEG(1.25_330.7525)	POS(1.04_146.1164)	NEG(14.6_199.85)	POS(2_153.0648)	POS(11.93_165.1623)	POS(1.37_237.0085)	POS(1.87_154.9907)	POS(7.82_149.1313)	NEG(3.39_353.1074)	NEG(8.37_449.4171)	POS(11.92_107.0844)		POS(1.27_131.9287)
POS(0.82_344.8741)	POS(0.81_186.9198)	POS(10.86_177.1113)	NEG(1.25_386.7142)	POS(1.04_87.0433)	NEG(14.6_248.9591)	POS(3.1_231.0823)	POS(11.93_175.1466)	POS(1.37_240.9638)	POS(1.87_155.9495)	POS(7.82_158.0801)	NEG(3.39_353.1419)	NEG(8.37_450.3125)	POS(11.92_263.1926)		POS(1.32_234.9798)
POS(0.82_416.8768)	POS(0.81_190.9099)	POS(10.87_358.1481)	NEG(1.25_446.6701)	POS(1.06_142.9468)	NEG(14.6_316.9467)	POS(3.13_231.0687)	POS(11.93_193.157)	POS(1.37_267.9518)	POS(1.87_179.9731)	POS(7.82_159.1156)	NEG(3.39_397.1241)	NEG(8.37_516.2925)	POS(11.92_71.0487)		POS(1.34_193.9281)
POS(0.82_604.791)	POS(0.81_200.9715)	POS(10.88_313.1765)	NEG(1.25_506.6262)	POS(1.07_116.0695)	NEG(14.6_378.9171)	POS(3.15_102.0904)	POS(11.93_220.1305)	POS(1.37_268.9587)	POS(1.87_197.9831)	POS(7.82_175.1468)	NEG(3.39_399.1135)	NEG(8.37_516.3636)	POS(11.92_91.0533)		POS(1.35_326.9321)
POS(0.82_65.0108)	POS(0.81_203.9194)	POS(10.89_385.1982)	NEG(1.31_165.0391)	POS(1.08_116.1057)	NEG(14.6_384.9342)	POS(3.29_621.1957)	POS(11.93_268.1535)	POS(1.37_320.928)	POS(1.87_229.0273)	POS(7.82_177.1261)	NEG(3.39_413.1017)	NEG(8.37_517.2148)	POS(11.93_221.2245)		POS(1.37_240.9638)
POS(0.82_68.0158)	POS(0.81_219.8978)	POS(10.91_293.2066)	NEG(1.31_367.1043)	POS(1.08_154.0244)	NEG(14.6_446.9045)	POS(3.29_621.3209)	POS(11.93_301.1733)	POS(1.38_224.9686)	POS(1.87_96.9955)	POS(7.82_185.131)	NEG(3.39_429.0741)	NEG(8.37_533.2698)	POS(11.93_280.3057)		POS(1.37_267.9518)
POS(0.83_214.9927)	POS(0.81_284.8794)	POS(10.97_250.1405)	NEG(1.32_127.0194)	POS(1.08_244.0775)	NEG(14.6_514.893)	POS(3.29_621.4463)	POS(11.93_93.069)	POS(1.38_252.0291)	POS(1.88_145.0065)	POS(7.82_189.1623)	NEG(3.39_516.1982)	NEG(8.37_548.2308)	POS(11.93_93.069)		POS(1.37_268.9587)
POS(0.83_218.9396)	POS(0.81_328.8963)	POS(10.98_277.1781)	NEG(1.32_366.1074)	POS(1.08_70.0645)	NEG(14.6_520.9099)	POS(3.29_709.6506)	POS(11.93_95.0847)	POS(1.4_126.0632)	POS(1.88_170.0111)	POS(7.82_201.1624)	NEG(3.39_518.1883)	NEG(8.37_578.2638)	POS(11.94_151.0698)		POS(1.37_283.0307)
POS(0.83_360.8659)	POS(0.81_398.9035)	POS(10.99_161.0952)	NEG(1.35_158.8456)	POS(1.1_187.0563)	NEG(14.61_130.998)	POS(3.29_709.7937)	POS(11.94_151.0698)	POS(1.4_161.0107)	POS(1.88_197.9582)	POS(7.82_203.1416)	NEG(3.39_532.1756)	NEG(9.03_311.2214)	POS(11.94_235.2036)		POS(1.38_224.9686)
POS(0.83_414.8803)	POS(0.81_400.9001)	POS(10.99_262.1412)	NEG(1.35_160.841)	POS(1.16_293.0973)	NEG(14.61_146.9234)	POS(3.29_710.0801)	POS(11.94_159.1151)	POS(1.4_169.0749)	POS(1.91_176.0644)	POS(7.82_207.6182)	NEG(3.39_547.1407)		POS(11.94_369.259)		POS(1.45_210.9756)
POS(0.84_174.9655)	POS(0.81_429.8461)	POS(10.99_291.1916)	NEG(1.35_162.838)	POS(1.18_100.0747)	NEG(14.61_146.937)	POS(3.29_710.2232)	POS(11.94_189.0765)	POS(1.4_212.9752)	POS(1.91_230.0682)	POS(7.82_213.1622)	NEG(3.39_564.1925)		POS(11.94_377.203)		POS(1.52_124.0384)
POS(0.84_214.9159)	POS(0.81_442.8769)	POS(10_200.1993)	NEG(1.35_195.8098)	POS(1.18_203.1376)	NEG(14.61_146.9601)	POS(3.29_710.3661)	POS(11.94_235.2036)	POS(1.44_159.0261)	POS(1.91_289.9997)	POS(7.82_217.1565)	NEG(3.39_683.2663)		POS(11.94_389.3393)		POS(1.53_208.1792)
POS(0.84_234.9316)	POS(0.81_458.8551)	POS(11.01_401.2996)	NEG(1.35_197.8068)	POS(1.18_247.0916)	NEG(14.61_158.9774)	POS(3.29_827.9237)	POS(11.94_246.182)	POS(1.45_142.9912)	POS(1.92_156.9932)	POS(7.82_226.6261)	NEG(3.39_72.0075)		POS(11.94_425.2858)		POS(8.03_113.939)
POS(0.84_241.9977)	POS(0.81_474.8324)	POS(11.03_293.2068)	NEG(1.35_199.8038)	POS(1.23_162.0489)	NEG(14.61_166.9232)	POS(3.29_828.0908)	POS(11.94_265.1045)	POS(1.45_188.0049)	POS(1.93_100.9899)	POS(7.82_227.1777)	NEG(3.77_142.065)		POS(11.95_217.1926)
POS(0.84_286.9167)	POS(0.81_66.0183)	POS(11.05_219.1727)	NEG(1.35_201.8009)	POS(1.24_202.037)	NEG(14.61_174.9549)	POS(3.31_261.1297)	POS(11.94_377.203)	POS(1.45_210.9756)	POS(1.93_101.0074)	POS(7.82_235.6315)	NEG(3.77_159.0915)		POS(11.95_311.176)
POS(0.84_312.9186)	POS(0.81_68.9815)	POS(11.07_221.083)	NEG(1.36_193.8143)	POS(1.24_254.0049)	NEG(14.61_174.9935)	POS(3.31_261.1796)	POS(11.95_166.1217)	POS(1.45_216.9912)	POS(1.93_102.9961)	POS(7.82_244.6367)	NEG(3.77_203.0813)		POS(11.95_335.1798)
POS(0.84_69.022)	POS(0.81_82.013)	POS(11.07_335.124)	NEG(1.5_294.8213)	POS(1.24_389.9745)	NEG(14.61_178.9474)	POS(3.32_281.0978)	POS(11.95_217.1926)	POS(1.46_177.9911)	POS(1.93_105.0116)	POS(7.82_252.1579)	NEG(3.77_203.1234)		POS(11.95_399.2125)
POS(0.85_128.0695)	POS(0.81_84.959)	POS(11.07_335.2173)	NEG(1.52_228.8478)	POS(1.24_72.0801)	NEG(14.61_190.8521)	POS(3.35_275.1085)	POS(11.95_220.1133)	POS(1.46_179.9729)	POS(1.93_130.991)	POS(7.82_321.2563)	NEG(3.77_225.063)		POS(11.96_429.3162)
POS(0.85_130.0855)	POS(0.81_84.9865)	POS(11.08_278.2138)	NEG(1.58_154.903)	POS(1.26_262.1269)	NEG(14.61_190.8946)	POS(3.35_315.1324)	POS(11.95_259.1148)	POS(1.48_350.929)	POS(1.93_143.0004)	POS(7.82_339.267)	NEG(3.77_287.0336)		POS(11.97_239.15)
POS(0.85_200.0215)	POS(0.81_88.9517)	POS(11.08_347.1605)	NEG(1.6_156.8998)	POS(1.36_252.9866)	NEG(14.61_190.9271)	POS(3.36_144.1156)	POS(11.95_279.1547)	POS(1.49_133.9651)	POS(1.93_147.0221)	POS(7.82_414.2996)	NEG(3.77_429.1531)		POS(11.97_262.1778)
POS(0.85_84.0799)	POS(0.82_126.9715)	POS(11.08_349.2706)	NEG(1.72_166.865)	POS(1.36_304.953)	NEG(14.61_191.9449)	POS(3.36_243.0828)	POS(11.95_299.1378)	POS(1.5_114.9963)	POS(1.93_173.0307)	POS(7.82_414.367)	NEG(3.79_130.0866)		POS(11.97_439.202)
POS(0.86_110.0702)	POS(0.82_172.9326)	POS(11.1_305.2072)	NEG(1.78_153.0293)	POS(1.37_206.9812)	NEG(14.61_200.8795)	POS(3.37_715.5602)	POS(11.95_311.176)	POS(1.5_196.985)	POS(1.93_175.9753)	POS(7.82_414.4069)	NEG(3.88_135.0438)		POS(11.98_223.1454)
POS(0.86_156.0755)	POS(0.82_183.037)	POS(11.1_347.2535)	NEG(1.85_184.8753)	POS(1.37_211.0028)	NEG(14.61_232.8903)	POS(3.38_167)	POS(11.95_335.1798)	POS(1.5_312.9712)	POS(1.93_182.9922)	POS(7.82_414.4705)	NEG(3.88_181.0493)		POS(11.98_288.1524)
POS(0.86_266.9259)	POS(0.82_222.9054)	POS(11.13_281.1708)	NEG(1.85_219.8441)	POS(1.37_268.9587)	NEG(14.61_234.8862)	POS(3.38_262.1183)	POS(11.96_273.1298)	POS(1.51_113.0058)	POS(1.93_203.0212)	POS(7.82_472.4183)	NEG(4.35_281.0991)		POS(11.98_339.2478)
POS(0.86_334.9133)	POS(0.82_238.9184)	POS(11.14_339.2082)	NEG(1.92_256.9154)	POS(1.37_346.9681)	NEG(14.61_242.9421)	POS(3.39_572.7128)	POS(11.96_275.157)	POS(1.51_131.9496)	POS(1.93_218.9922)	POS(7.82_488.2686)	NEG(4.48_165.0545)		POS(11.98_385.2907)
POS(0.86_83.0595)	POS(0.82_240.9195)	POS(11.14_361.2328)	NEG(1.93_123.0061)	POS(1.37_580.9846)	NEG(14.61_248.8976)	POS(3.39_703.9587)	POS(11.97_120.055)	POS(1.51_135.0015)	POS(1.93_247.0474)	POS(7.82_489.2719)	NEG(4.48_186.0549)		POS(11.98_419.3166)
POS(0.87_220.9332)	POS(0.82_250.9097)	POS(11.15_190.1572)	NEG(1.93_123.03)	POS(1.4_152.0082)	NEG(14.61_260.9195)	POS(3.39_704.3595)	POS(11.97_124.086)	POS(1.51_169.0051)	POS(1.93_262.0117)	POS(7.82_506.2406)	NEG(4.48_204.0652)		POS(11.99_256.3832)
POS(0.87_288.9207)	POS(0.82_284.9237)	POS(11.18_214.2146)	NEG(1.93_124.0462)	POS(1.43_98.0339)	NEG(14.61_276.8901)	POS(3.39_704.5598)	POS(11.97_136.0853)	POS(1.51_177.0322)	POS(1.94_116.9258)	POS(7.82_76.0386)	NEG(4.51_129.0545)		POS(11.99_261.1291)
POS(0.87_389.0204)	POS(0.82_315.8664)	POS(11.18_313.1541)	NEG(1.93_124.0593)	POS(1.43_99.018)	NEG(14.61_276.9172)	POS(3.39_715.385)	POS(11.97_169.0783)	POS(1.51_179.9981)	POS(1.94_149.0176)	POS(7.82_79.0533)	NEG(4.51_129.076)		POS(11.99_293.1705)
POS(0.87_424.8954)	POS(0.82_344.8741)	POS(11.19_235.2039)	NEG(1.93_124.9658)	POS(1.49_126.0288)	NEG(14.61_278.8999)	POS(3.39_715.6389)	POS(11.97_222.167)	POS(1.51_201.9545)	POS(1.94_81.0003)	POS(7.83_187.1467)	NEG(4.51_185.0116)		POS(11.99_305.2064)
POS(0.87_486.8662)	POS(0.82_416.8768)	POS(11.2_371.238)	NEG(1.93_149.9384)	POS(1.49_141.0399)	NEG(14.61_287.8886)	POS(3.39_715.967)	POS(11.97_236.1608)	POS(1.51_215.0148)	POS(1.95_126.0108)	POS(8.44_157.0999)	NEG(4.51_187.0271)		POS(11.99_433.2905)
POS(0.89_191.0755)	POS(0.82_604.791)	POS(11.21_305.1309)	NEG(1.93_161.9169)	POS(1.49_169.0348)	NEG(14.61_288.9351)	POS(3.39_766.158)	POS(11.97_239.15)	POS(1.52_132.986)	POS(1.99_130.0852)	POS(8.89_215.5923)	NEG(4.51_197.0343)		POS(12_200.1992)
POS(0.89_356.9075)	POS(0.82_65.0108)	POS(11.22_291.2278)	NEG(1.93_161.9341)	POS(1.49_361.0223)	NEG(14.61_294.9517)	POS(3.39_766.4087)	POS(11.97_251.124)	POS(1.52_170.9861)	POS(1.99_257.1115)	POS(9.02_414.2994)	NEG(4.51_232.969)		POS(12_256.2984)
POS(0.89_492.8832)	POS(0.82_68.0158)	POS(11.23_383.2025)	NEG(1.93_165.9335)	POS(1.5_133.0307)	NEG(14.61_304.8618)	POS(3.39_766.6593)	POS(11.97_253.1121)	POS(1.52_181.9896)	POS(10.28_277.2148)	POS(9.72_275.1989)	NEG(4.51_249.0039)		POS(12_329.2125)
POS(0.89_560.8709)	POS(0.82_734.7484)	POS(11.24_245.0773)	NEG(1.93_165.9563)	POS(1.5_262.127)	NEG(14.61_304.9622)	POS(3.39_879.6954)	POS(11.97_257.0987)	POS(1.52_186.9899)	POS(2.01_175.0265)		NEG(4.51_281.099)		POS(12_341.2644)
POS(0.89_628.8582)	POS(0.83_214.9927)	POS(11.24_261.0416)	NEG(1.93_167.0603)	POS(1.5_276.0885)	NEG(14.61_308.9047)	POS(3.4_231.1186)	POS(11.98_134.0701)	POS(1.52_198.9803)	POS(2.45_143.0003)		NEG(4.51_343.0698)		POS(12_347.2187)
POS(0.89_696.8457)	POS(0.83_218.9396)	POS(11.24_301.1898)	NEG(1.93_167.1279)	POS(1.5_55.0288)	NEG(14.61_310.8474)	POS(3.41_132.1007)	POS(11.98_149.045)	POS(1.52_230.9799)	POS(2.45_149.0177)		NEG(4.53_197.0019)		POS(12_348.2852)
POS(0.9_327.0501)	POS(0.83_238.8827)	POS(11.25_134.0596)	NEG(1.93_193.8841)	POS(1.5_87.0254)	NEG(14.61_310.8703)	POS(3.41_244.1163)	POS(11.98_212.0908)	POS(1.52_328.9487)	POS(2.5_124.9898)		NEG(5.87_613.3587)		POS(12_363.2877)
POS(0.9_764.8331)	POS(0.83_240.8798)	POS(11.25_342.2671)	NEG(1.93_250.9719)	POS(1.53_135.0424)	NEG(14.61_310.9295)	POS(3.41_305.2118)	POS(11.98_223.1454)	POS(1.53_128.9847)	POS(2.51_154.9776)		NEG(7.85_510.2522)		POS(12_389.2636)
POS(0.9_832.8205)	POS(0.83_360.8659)	POS(11.3_327.2121)	NEG(1.93_263.9446)	POS(1.54_280.1153)	NEG(14.61_316.8888)	POS(3.42_305.1558)	POS(11.98_243.1296)	POS(1.6_167.9577)	POS(2.51_167.0001)		POS(11.76_335.2788)		POS(12_443.3317)
POS(0.9_900.808)	POS(0.83_414.8803)	POS(11.31_255.1741)	NEG(1.93_296.9772)	POS(1.57_326.1218)	NEG(14.61_320.8848)	POS(3.43_89.0588)	POS(11.98_288.1524)	POS(1.61_161.9746)	POS(2.51_191.0277)				POS(12_517.3707)
POS(0.92_227.0575)	POS(0.84_174.9655)	POS(11.32_175.1111)	NEG(1.93_330.9338)	POS(1.58_113.0334)	NEG(14.61_321.9006)	POS(3.45_268.0486)	POS(11.98_307.1501)	POS(1.62_203.0374)	POS(2.58_126.0287)				POS(12_537.3947)
POS(0.93_200.0394)	POS(0.84_214.9159)	POS(11.32_256.3486)	NEG(1.93_340.8888)	POS(1.58_134.0177)	NEG(14.61_322.8524)	POS(3.46_260.1131)	POS(11.99_122.0703)	POS(1.74_279.0919)	POS(2.61_139.0054)				POS(12_561.3968)
POS(0.93_410.8551)	POS(0.84_234.9316)	POS(11.33_340.2098)	NEG(1.93_400.9938)	POS(1.58_329.0276)	NEG(14.61_322.8856)	POS(3.47_201.1087)	POS(11.99_137.1313)	POS(1.77_151.9209)	POS(2.79_208.1316)				POS(12_587.5479)
POS(0.93_614.8181)	POS(0.84_241.9977)	POS(11.34_414.2348)	NEG(1.93_96.019)	POS(1.61_108.0797)	NEG(14.61_330.8375)	POS(3.47_221.0103)	POS(11.99_152.0808)	POS(1.8_194.9525)	POS(2.96_137.0451)				POS(12_84.0876)
POS(0.94_91.0203)	POS(0.84_286.9167)	POS(11.36_345.2357)	NEG(1.94_222.9542)	POS(1.61_133.0312)	NEG(14.61_372.8999)	POS(3.47_227.0229)	POS(11.99_187.0949)	POS(1.84_66.0183)	POS(3.04_252.0712)				POS(8.79_409.1613)
POS(0.95_158.9633)	POS(0.84_312.9186)	POS(11.37_163.111)	NEG(1.95_187.0408)	POS(1.61_61.0103)	NEG(14.61_378.8527)	POS(3.47_318.1897)	POS(11.99_189.078)	POS(1.85_198.9389)	POS(3.04_334.1106)
POS(0.95_226.9507)	POS(0.84_69.022)	POS(11.37_343.1458)	NEG(1.96_228.9377)	POS(1.63_136.1093)	NEG(14.61_384.8587)	POS(3.47_319.1348)	POS(11.99_231.1192)	POS(10.59_188.6469)	POS(3.13_231.0687)
POS(0.95_226.997)	POS(0.84_85.0001)	POS(11.38_177.1283)	NEG(1.96_296.9256)	POS(1.64_107.048)	NEG(14.61_434.8055)	POS(3.47_341.1168)	POS(11.99_232.0899)	POS(11.07_221.083)	POS(3.29_276.1788)
POS(0.95_227.0329)	POS(0.85_128.0695)	POS(11.4_319.2232)	NEG(1.96_332.9498)	POS(1.64_119.0483)	NEG(14.61_434.8706)	POS(3.5_161.0376)	POS(11.99_233.1504)	POS(11.1_96.0805)	POS(3.3_156.0205)
POS(0.95_362.9256)	POS(0.85_130.0855)	POS(11.4_392.3107)	NEG(1.97_172.9756)	POS(1.64_123.0432)	NEG(14.61_440.8875)	POS(3.5_261.0897)	POS(11.99_245.1346)	POS(11.15_190.1572)	POS(3.32_162.0402)
POS(0.95_414.9385)	POS(0.85_200.0215)	POS(11.4_443.2969)	NEG(1.97_218.9236)	POS(1.64_136.0747)	NEG(14.61_452.8441)	POS(3.5_275.0789)	POS(11.99_259.1505)	POS(11.5_107.069)	POS(3.32_281.0978)
POS(0.95_430.9768)	POS(0.85_299.0385)	POS(11.41_252.1562)	NEG(1_288.892)	POS(1.64_136.1262)	NEG(14.61_564.8293)	POS(3.5_275.1449)	POS(11.99_261.1291)	POS(11.57_109.1001)	POS(3.38_167)
POS(0.95_498.9012)	POS(0.85_413.0187)	POS(11.42_219.1726)	NEG(2.03_127.8692)	POS(1.64_136.1346)	NEG(14.61_70.9972)	POS(3.5_316.2101)	POS(11.99_70.0647)	POS(11.58_385.1795)	POS(3.47_180.0869)
POS(0.95_566.8891)	POS(0.85_84.0799)	POS(11.42_315.1856)	NEG(2.03_183.969)	POS(1.64_147.0762)	NEG(14.61_86.975)	POS(3.5_349.1821)	POS(11.99_96.0811)	POS(11.6_371.1645)	POS(3.47_210.1474)
POS(0.95_582.8621)	POS(0.86_110.0702)	POS(11.42_419.252)	NEG(2.03_211.9862)	POS(1.64_165.0536)	NEG(14.61_885.5494)	POS(3.51_201.1219)	POS(11.99_97.0755)	POS(11.63_133.0843)	POS(3.47_221.0103)
POS(0.95_634.8765)	POS(0.86_116.0695)	POS(11.42_422.2926)	NEG(3.38_164.0705)	POS(1.64_226.0435)	NEG(14.62_118.9918)	POS(3.51_214.0961)	POS(12_106.065)	POS(11.71_90.506)	POS(3.47_227.0229)
POS(0.95_650.8493)	POS(0.86_156.0755)	POS(11.44_133.0757)	NEG(3.39_147.044)	POS(1.64_317.9968)	NEG(14.62_162.9817)	POS(3.52_210.0511)	POS(12_107.0595)	POS(11.74_273.166)	POS(3.47_318.1897)
POS(0.95_718.8369)	POS(0.86_175.1175)	POS(11.44_261.2193)	NEG(3.39_232.0574)	POS(1.64_91.0535)	NEG(14.62_178.9765)	POS(3.52_246.1686)	POS(12_109.0747)	POS(11.74_88.0033)	POS(3.5_157.016)
POS(0.95_770.8517)	POS(0.86_223.0521)	POS(11.44_321.2012)	NEG(3.39_294.0282)	POS(1.64_91.0815)	NEG(14.62_180.8986)	POS(3.53_130.1579)	POS(12_124.0495)	POS(11.76_106.0703)	POS(3.5_161.0376)
POS(0.95_804.8439)	POS(0.86_237.0679)	POS(11.44_350.2288)	NEG(4.34_214.9249)	POS(1.65_146.1163)	NEG(14.62_206.9351)	POS(3.53_363.1611)	POS(12_136.051)	POS(11.8_235.129)	POS(3.5_163.0329)
POS(0.95_812.831)	POS(0.86_266.9259)	POS(11.44_363.157)	NEG(4.48_165.0545)	POS(1.65_220.0266)	NEG(14.62_206.9713)	POS(3.54_245.0486)	POS(12_138.0649)	POS(11.8_99.5113)	POS(3.5_163.0745)
POS(0.95_838.8391)	POS(0.86_285.0227)	POS(11.45_347.2544)	POS(0.92_227.0575)	POS(1.67_265.0351)	NEG(14.63_210.9485)	POS(3.55_393.2082)	POS(12_140.1129)	POS(11.82_279.0922)	POS(3.5_171.0219)
POS(0.95_846.824)	POS(0.86_301.0003)	POS(11.46_153.1625)	POS(0.92_922.8845)	POS(1.68_123.0544)	NEG(14.63_250.8609)	POS(3.55_393.2726)	POS(12_147.0655)	POS(11.87_249.1083)	POS(3.5_261.0897)
POS(0.95_854.8119)	POS(0.86_315.016)	POS(11.48_353.2642)	POS(0.93_854.8962)	POS(1.75_230.1372)	NEG(14.64_134.8643)	POS(3.56_319.171)	POS(12_149.0816)	POS(11.9_441.2981)	POS(3.5_275.0789)
POS(0.95_872.8313)	POS(0.86_334.9133)	POS(11.48_374.3012)	POS(0.95_226.997)	POS(1.75_69.0691)	NEG(14.65_101.9398)	POS(3.57_256.1141)	POS(12_150.0661)	POS(11.91_305.159)	POS(3.51_144.0421)
POS(0.95_880.8181)	POS(0.86_373.0429)	POS(11.48_727.4597)	POS(0.95_346.9508)	POS(1.76_176.0644)	NEG(14.65_145.93)	POS(3.57_407.1874)	POS(12_151.0971)	POS(11.93_119.0844)	POS(3.63_85.0639)
POS(0.95_90.976)	POS(0.86_428.9965)	POS(11.49_207.2089)	POS(0.95_430.9768)	POS(1.76_301.1418)	NEG(14.65_151.922)	POS(3.58_245.1344)	POS(12_159.0663)	POS(11.93_133.0997)	POS(4.1_288.2159)
POS(0.95_906.8264)	POS(0.86_70.0644)	POS(11.49_361.1762)	POS(0.95_566.8891)	POS(1.76_86.0955)	NEG(14.65_159.8591)	POS(3.58_275.1446)	POS(12_163.0969)	POS(11.93_158.1528)
POS(0.95_907.3256)	POS(0.86_83.0595)	POS(11.5_135.1157)	POS(0.95_634.8765)	POS(1.77_135.029)	NEG(14.65_159.8917)	POS(3.58_429.1694)	POS(12_166.0972)	POS(11.94_159.1151)
POS(0.95_91.0185)	POS(0.87_220.9332)	POS(11.5_181.1931)	POS(0.95_778.8364)	POS(1.77_306.0794)	NEG(14.66_150.9145)	POS(3.6_177.1109)	POS(12_173.0779)	POS(11.95_217.1926)
POS(0.95_914.8114)	POS(0.87_288.9207)	POS(11.5_240.2308)	POS(0.95_804.8439)	POS(1.84_216.0308)	NEG(14.66_162.9315)	POS(3.6_289.1243)	POS(12_173.1308)	POS(11.95_259.1148)
POS(0.95_922.7996)	POS(0.87_321.0329)	POS(11.5_267.1556)	POS(0.95_812.831)	POS(1.87_230.1373)	NEG(14.66_177.9024)	POS(3.6_437.2349)	POS(12_175.0969)	POS(11.95_279.1547)
POS(0.95_940.8188)	POS(0.87_389.0204)	POS(11.5_268.262)	POS(0.95_838.8391)	POS(1.87_276.1426)	NEG(14.67_182.9534)	POS(3.63_259.1132)	POS(12_177.0781)	POS(11.97_169.0783)
POS(0.95_948.8055)	POS(0.87_424.8954)	POS(11.5_347.1608)	POS(0.95_846.824)	POS(1.89_170.0472)	NEG(14.73_180.9213)	POS(3.63_481.2615)	POS(12_177.112)	POS(11.97_239.15)
POS(0.95_975.8158)	POS(0.87_486.8662)	POS(11.5_349.2906)	POS(0.95_872.8313)	POS(1.9_216.0527)	NEG(14.75_136.9291)	POS(3.65_257.098)	POS(12_179.1285)	POS(11.97_251.124)
POS(0.96_158.9991)	POS(0.89_177.0598)	POS(11.5_369.2964)	POS(0.95_880.8181)	POS(1.9_301.1418)	NEG(14.79_278.8525)	POS(3.66_289.1606)	POS(12_181.1141)	POS(11.97_257.0987)
POS(0.96_227.0544)	POS(0.89_191.0755)	POS(11.5_413.3219)	POS(0.95_898.8371)	POS(1.9_86.0956)	NEG(14.81_125.8987)	POS(3.66_525.288)	POS(12_201.1093)	POS(11.99_137.1313)
POS(0.96_91.0039)	POS(0.89_356.9075)	POS(11.5_438.2654)	POS(0.95_906.8264)	POS(1.91_176.0644)	NEG(14.82_181.8971)	POS(3.67_287.0993)	POS(12_204.1237)	POS(11.99_245.1346)
POS(0.97_159.0491)	POS(0.89_492.8832)	POS(11.5_683.4335)	POS(0.95_907.3256)	POS(1.91_230.0682)	NEG(14.83_159.8913)	POS(3.93_119.0483)	POS(12_206.1034)	POS(11.99_259.1505)
POS(0.97_216.9218)	POS(0.89_560.8709)	POS(11.51_170.1527)	POS(0.95_914.8114)	POS(1.91_289.9997)	NEG(14.84_125.8721)	POS(3.93_307.1144)	POS(12_206.1391)	POS(11.99_261.1291)
POS(0.97_218.9188)	POS(0.89_628.8582)	POS(11.51_279.2672)	POS(0.95_940.8188)	POS(1.97_218.1374)	NEG(14.84_159.8589)	POS(3.93_307.1661)	POS(12_215.1239)	POS(12_173.1308)
POS(0.97_266.8483)	POS(0.89_696.8457)	POS(11.52_185.1872)	POS(0.95_948.8055)	POS(1.98_159.064)	NEG(14.84_166.8649)	POS(4.02_273.166)	POS(12_217.1032)	POS(12_181.1141)
POS(0.97_342.8673)	POS(0.9_327.0501)	POS(11.52_296.3309)	POS(0.95_975.8158)	POS(1.98_218.1837)	NEG(14.84_184.8754)	POS(4.05_145.1001)	POS(12_245.0985)	POS(12_217.1032)
POS(0.97_352.8965)	POS(0.9_531.0131)	POS(11.52_390.2375)	POS(0.95_982.799)	POS(1_102.0904)	NEG(14.84_186.8727)	POS(4.05_307.1142)	POS(12_257.1356)	POS(12_245.0985)
POS(0.97_354.8936)	POS(0.9_764.8331)	POS(11.53_193.1933)	POS(0.96_322.8853)	POS(1_103.038)	NEG(14.84_219.8443)	POS(4.1_288.2159)	POS(12_265.1395)	POS(12_291.1199)
POS(0.97_400.826)	POS(0.9_832.8205)	POS(11.53_359.2533)	POS(0.96_866.7851)	POS(1_162.1116)	NEG(14.85_157.8619)	POS(4.13_119.0482)	POS(12_277.1393)	POS(2.12_166.9574)
POS(0.97_420.884)	POS(0.9_900.808)	POS(11.53_372.1646)	POS(0.96_969.7965)	POS(1_162.1791)	NEG(14.85_168.8626)	POS(4.13_97.9463)	POS(12_287.1477)	POS(2.14_141.9576)
POS(0.97_422.8812)	POS(0.9_968.7957)	POS(11.53_392.2581)	POS(0.97_148.934)	POS(1_198.0834)	NEG(14.85_221.8412)	POS(4.15_277.1036)	POS(12_291.1199)	POS(2.28_174.9656)
POS(0.97_478.8428)	POS(0.92_227.0575)	POS(11.54_221.2245)	POS(0.97_216.9218)	POS(1_70.0645)	NEG(14.86_164.8704)	POS(4.17_96.9749)	POS(12_349.1887)	POS(2.28_176.9287)
POS(0.97_488.8718)	POS(0.92_336.0135)	POS(11.54_639.4072)	POS(0.97_218.9188)	POS(2.09_262.1632)	NEG(14.86_164.8932)	POS(7.84_271.1866)	POS(12_84.0876)	POS(2.28_66.0183)
POS(0.97_490.8695)	POS(0.92_922.8845)	POS(11.55_357.1456)	POS(0.97_266.8483)	POS(2.12_175.0852)	NEG(14.9_158.8455)	POS(7.94_351.1551)	POS(12_98.0699)	POS(2.29_136.9837)
POS(0.97_548.828)	POS(0.93_200.0394)	POS(11.55_590.4255)	POS(0.97_327.0137)	POS(2.13_130.0639)	NEG(14.9_160.841)	POS(8.01_105.1089)	POS(4.14_97.9678)	POS(2.29_198.9389)
POS(0.97_750.7927)	POS(0.93_410.8551)	POS(11.56_170.116)	POS(0.97_332.8383)	POS(2.17_203.08)	NEG(14.9_162.838)	POS(8.03_105.0692)		POS(2.3_217.955)
POS(0.97_828.8087)	POS(0.93_614.8181)	POS(11.57_180.0988)	POS(0.97_342.8673)	POS(2.42_223.1038)	NEG(14.9_164.8351)	POS(8.03_105.0993)		POS(2.42_279.0919)
POS(0.97_886.7666)	POS(0.93_854.8962)	POS(11.57_210.1086)	POS(0.97_352.8965)	POS(2.45_149.0177)	NEG(14.9_166.8324)	POS(8.03_105.1148)		POS(2.43_130.0068)
POS(0.97_896.7958)	POS(0.94_91.0203)	POS(11.57_379.1512)	POS(0.97_354.8936)	POS(2.83_104.0487)	NEG(14.9_193.8143)	POS(8.03_105.1246)		POS(2.53_151.9209)
POS(0.97_964.7832)	POS(0.95_158.9633)	POS(11.57_390.2959)	POS(0.97_392.7945)	POS(2.83_120.0433)	NEG(14.9_195.8098)	POS(8.03_110.9743)		POS(2.58_194.9522)
POS(0.98_206.8927)	POS(0.95_226.9507)	POS(11.58_294.2404)	POS(0.97_400.826)	POS(2.83_132.0435)	NEG(14.9_197.8068)	POS(8.03_137.0586)		POS(2.6_198.939)
POS(0.98_796.419)	POS(0.95_226.997)	POS(11.58_301.0736)	POS(0.97_412.8522)	POS(2.83_147.0621)	NEG(14.9_199.8038)	POS(8.03_153.0374)		POS(3.02_194.1161)
POS(0.98_96.9209)	POS(0.95_227.0329)	POS(11.6_502.3729)	POS(0.97_420.884)	POS(2.83_150.0546)	NEG(2.01_168.8627)	POS(8.03_166.0374)		POS(3.12_179.9885)
POS(0.99_104.1061)	POS(0.95_232.9063)	POS(11.61_359.2061)	POS(0.97_422.8812)	POS(2.83_192.0641)		POS(8.03_267.1208)		POS(3.18_136.1109)
POS(0.99_130.0955)	POS(0.95_346.9508)	POS(11.63_271.1519)	POS(0.97_478.8428)	POS(2.86_310.1269)		POS(8.03_346.1238)		POS(3.18_279.0919)
POS(0.99_173.0285)	POS(0.95_362.9256)	POS(11.63_333.2335)	POS(0.97_488.8718)	POS(2.87_103.1129)		POS(8.03_409.3293)		POS(3.35_275.1085)
POS(0.99_175.1176)	POS(0.95_414.9385)	POS(11.63_335.2775)	POS(0.97_490.8695)	POS(2.88_102.0454)		POS(8.03_77.0379)		POS(3.52_181.1141)
POS(0.99_191.0392)	POS(0.95_430.9768)	POS(11.66_191.0899)	POS(0.97_526.7727)	POS(2.88_103.0535)		POS(8.03_78.0407)		POS(3.52_279.092)
POS(0.99_196.8638)	POS(0.95_498.9012)	POS(11.66_287.1478)	POS(0.97_536.8015)	POS(2.88_103.0956)		POS(8.03_97.0275)		POS(3.53_130.1579)
POS(0.99_219.0242)	POS(0.95_566.8891)	POS(11.68_405.2594)	POS(0.97_538.7987)	POS(2.88_107.048)		POS(8.04_105.1353)		POS(3.56_162.1263)
POS(0.99_254.8224)	POS(0.95_582.8621)	POS(11.71_293.2069)	POS(0.97_548.828)	POS(2.88_120.08)		POS(8.04_409.2274)		POS(3.58_275.1446)
POS(0.99_256.8196)	POS(0.95_634.8765)	POS(11.71_335.2542)	POS(0.97_556.8596)	POS(2.88_120.1132)		POS(8.06_409.3026)		POS(3.6_177.1377)
POS(0.99_258.8165)	POS(0.95_650.8493)	POS(11.72_416.3209)	POS(0.97_616.8148)	POS(2.88_120.1411)		POS(8.23_116.975)		POS(3.6_289.1243)
POS(0.99_306.957)	POS(0.95_686.889)	POS(11.74_273.166)	POS(0.97_624.8471)	POS(2.88_120.1614)		POS(8.26_157.0998)		POS(3.63_188.1419)
POS(0.99_314.7778)	POS(0.95_718.8369)	POS(11.74_335.2174)	POS(0.97_672.7761)	POS(2.88_120.1693)		POS(8.26_351.1552)		POS(3.63_259.1132)
POS(0.99_316.775)	POS(0.95_770.8517)	POS(11.75_277.2136)	POS(0.97_674.7741)	POS(2.88_166.085)		POS(8.62_268.2619)		POS(3.66_190.1576)
POS(0.99_364.9148)	POS(0.95_804.8439)	POS(11.77_315.1848)	POS(0.97_684.8027)	POS(2.88_204.0317)		POS(8.79_409.1613)		POS(6.98_112.955)
POS(0.99_372.7364)	POS(0.95_812.831)	POS(11.79_317.2024)	POS(0.97_692.8345)	POS(2.88_210.0488)		POS(8.79_98.9755)		POS(8.03_113.939)
POS(0.99_430.6954)	POS(0.95_822.864)	POS(11.8_235.129)	POS(0.97_742.762)	POS(2.88_234.0595)		POS(8.8_249.1104)		POS(8.03_118.0641)
POS(0.99_432.6924)	POS(0.95_838.8391)	POS(11.8_279.1936)	POS(0.97_750.7927)	POS(2.88_250.0371)		POS(8.8_91.0533)		POS(8.03_129.0536)
POS(0.99_778.4488)	POS(0.95_846.824)	POS(11.82_270.2773)	POS(0.97_752.7899)	POS(2.88_369.1107)		POS(8.81_407.1452)		POS(8.03_137.0586)
POS(0.99_780.4454)	POS(0.95_854.8119)	POS(11.82_279.0922)	POS(0.97_760.8219)	POS(2.88_77.0379)		POS(8.84_242.2825)		POS(8.03_77.0379)
POS(0.99_782.4427)	POS(0.95_872.8313)	POS(11.83_267.1198)	POS(0.97_790.6904)	POS(2.88_79.0534)		POS(8.89_207.606)		POS(8.03_91.0533)
POS(0.99_784.4397)	POS(0.95_880.8181)	POS(11.84_293.1344)	POS(0.97_799.8243)	POS(2.88_91.0533)		POS(8.89_207.6836)		POS(8.26_157.0998)
POS(0.99_84.0436)	POS(0.95_898.8371)	POS(11.87_249.1083)	POS(0.97_800.7192)	POS(2.88_93.069)		POS(8.89_409.2705)		POS(8.8_91.0533)
POS(1.01_203.0514)	POS(0.95_90.976)	POS(11.89_281.2934)	POS(0.97_808.7511)	POS(2.88_95.0481)		POS(9.05_363.1553)		POS(8.93_98.9819)
POS(1.01_205.0625)	POS(0.95_906.8264)	POS(11.9_240.2672)	POS(0.97_810.7484)	POS(2.89_120.1319)		POS(9.05_407.1452)		POS(9.88_298.3454)
POS(1.02_114.0649)	POS(0.95_91.0185)	POS(11.91_332.3292)	POS(0.97_828.8087)	POS(2.95_217.0364)		POS(9.3_113.0586)
POS(1.02_118.1577)	POS(0.95_914.8114)	POS(11.92_172.1115)	POS(0.97_858.6785)	POS(2.97_182.0797)		POS(9.3_119.0483)
POS(1.02_140.0675)	POS(0.95_922.7996)	POS(11.92_263.1926)	POS(0.97_867.8144)	POS(3.12_160.0164)		POS(9.3_139.0049)
POS(1.02_140.1025)	POS(0.95_940.8188)	POS(11.92_397.328)	POS(0.97_868.7069)	POS(3.13_232.1527)		POS(9.3_187.0263)
POS(1.02_204.0859)	POS(0.95_948.8055)	POS(11.93_119.0844)	POS(0.97_878.7365)	POS(3.2_231.0985)		POS(9.3_267.1212)
POS(1.02_58.0647)	POS(0.95_956.7912)	POS(11.93_133.0997)	POS(0.97_886.7666)	POS(3.23_125.1061)		POS(9.3_286.095)
POS(1.02_59.0725)	POS(0.95_975.8158)	POS(11.93_147.1155)	POS(0.97_896.7958)	POS(3.23_207.109)		POS(9.3_346.1236)
POS(1.02_96.0775)	POS(0.95_982.799)	POS(11.93_175.1466)	POS(0.97_925.7637)	POS(3.23_98.0589)		POS(9.3_406.1533)
POS(1.03_132.0756)	POS(0.96_158.9991)	POS(11.93_179.1777)	POS(0.97_926.6651)	POS(3.29_733.2314)		POS(9.3_409.1614)
POS(1.03_140.1356)	POS(0.96_227.0544)	POS(11.93_193.157)	POS(0.97_936.6934)	POS(3.3_229.0961)		POS(9.3_409.2264)
POS(1.03_90.0541)	POS(0.96_322.8853)	POS(11.94_159.1151)	POS(0.97_944.7233)	POS(3.32_156.0757)		POS(9.3_409.27)
POS(1.04_146.1164)	POS(0.96_866.7851)	POS(11.94_235.2036)	POS(0.97_946.7239)	POS(3.36_118.0643)		POS(9.3_409.3277)
POS(1.04_87.0433)	POS(0.96_91.0039)	POS(11.94_265.1045)	POS(0.97_964.7832)	POS(3.36_118.0955)		POS(9.3_471.1317)
POS(1.06_138.0537)	POS(0.96_969.7965)	POS(11.94_266.1711)	POS(0.98_120.0022)	POS(3.36_118.1251)		POS(9.3_795.3347)
POS(1.07_116.0695)	POS(0.97_148.934)	POS(11.95_220.1133)	POS(0.98_149.9897)	POS(3.36_118.1426)		POS(9.3_91.0533)
POS(1.08_166.0827)	POS(0.97_159.0491)	POS(11.95_259.1148)	POS(0.98_150.0126)	POS(3.36_132.0435)		POS(9.31_119.0977)
POS(1.08_203.0169)	POS(0.97_216.9218)	POS(11.95_279.1547)	POS(0.98_206.8927)	POS(3.36_142.1014)		POS(9.32_119.1101)
POS(1.08_244.0775)	POS(0.97_218.9188)	POS(11.96_273.1298)	POS(0.98_264.8512)	POS(3.36_144.0431)		POS(9.46_337.2334)
POS(1.08_332.0935)	POS(0.97_219.0815)	POS(11.96_275.157)	POS(0.98_796.419)	POS(3.36_144.0798)		POS(9.68_379.2098)
POS(1.08_70.0645)	POS(0.97_266.8483)	POS(11.97_236.1608)	POS(0.98_98.9181)	POS(3.36_144.1156)		POS(9.69_379.1507)
POS(1.1_144.101)	POS(0.97_327.0137)	POS(11.97_251.124)	POS(0.99_134.0177)	POS(3.36_144.1472)		POS(9.78_326.377)
POS(1.1_144.1665)	POS(0.97_332.8383)	POS(11.98_297.2386)	POS(0.99_171.1479)	POS(3.36_146.0593)		POS(9.88_520.3394)
POS(1.1_187.0563)	POS(0.97_342.8673)	POS(11.98_307.1501)	POS(0.99_173.0285)	POS(3.36_146.0958)		POS(9.89_221.1155)
POS(1.1_229.1167)	POS(0.97_352.8965)	POS(11.99_231.1192)	POS(0.99_175.0655)	POS(3.36_146.1255)
POS(1.1_84.0799)	POS(0.97_354.8936)	POS(11.99_245.1346)	POS(0.99_196.8638)	POS(3.36_146.1396)
POS(1.12_150.9965)	POS(0.97_392.7945)	POS(11.99_259.1505)	POS(0.99_248.9973)	POS(3.36_146.1587)
POS(1.13_180.0051)	POS(0.97_400.826)	POS(11.99_261.1291)	POS(0.99_254.8224)	POS(3.36_159.0906)
POS(1.15_101.0587)	POS(0.97_412.8522)	POS(11.99_293.1705)	POS(0.99_256.8196)	POS(3.36_160.0752)
POS(1.15_143.1167)	POS(0.97_420.884)	POS(11_365.1349)	POS(0.99_258.8165)	POS(3.36_170.0591)
POS(1.15_160.1322)	POS(0.97_422.8812)	POS(12_172.1681)	POS(0.99_270.7962)	POS(3.36_170.0975)
POS(1.15_60.0804)	POS(0.97_478.8428)	POS(12_173.0779)	POS(0.99_306.957)	POS(3.36_170.1148)
POS(1.16_226.896)	POS(0.97_488.8718)	POS(12_173.1308)	POS(0.99_308.9532)	POS(3.36_188.0698)
POS(1.18_100.0747)	POS(0.97_490.8695)	POS(12_181.1141)	POS(0.99_312.7807)	POS(3.36_188.1122)
POS(1.18_203.1376)	POS(0.97_526.7727)	POS(12_200.1992)	POS(0.99_314.7778)	POS(3.36_188.1445)
POS(1.19_158.9953)	POS(0.97_536.8015)	POS(12_201.1093)	POS(0.99_316.775)	POS(3.36_243.0427)
POS(1.19_194.1638)	POS(0.97_538.7987)	POS(12_206.1391)	POS(0.99_364.9148)	POS(3.36_243.0828)
POS(1.21_160.1003)	POS(0.97_548.828)	POS(12_215.1239)	POS(0.99_372.7364)	POS(3.36_249.0596)
POS(1.21_186.1109)	POS(0.97_556.8596)	POS(12_217.1032)	POS(0.99_430.6954)	POS(3.36_275.0603)
POS(1.23_162.0489)	POS(0.97_616.8148)	POS(12_245.0985)	POS(0.99_432.6924)	POS(3.36_89.0379)
POS(1.26_133.9261)	POS(0.97_624.8471)	POS(12_265.1395)	POS(0.99_548.6103)	POS(3.36_90.0453)
POS(1.26_262.1269)	POS(0.97_672.7761)	POS(12_277.1393)	POS(0.99_60.0552)	POS(3.37_144.1335)
POS(1.27_131.9287)	POS(0.97_674.7741)	POS(12_310.3092)	POS(0.99_778.4488)	POS(3.37_144.1677)
POS(1.28_204.2229)	POS(0.97_684.8027)	POS(12_347.2187)	POS(0.99_780.4454)	POS(3.37_148.0646)
POS(1.28_269.0728)	POS(0.97_692.8345)	POS(12_349.1887)	POS(0.99_782.4427)	POS(3.37_188.1825)
POS(1.29_204.1656)	POS(0.97_742.762)	POS(12_366.3711)	POS(0.99_784.4397)	POS(3.38_244.1073)
POS(1.29_85.0673)	POS(0.97_750.7927)	POS(12_406.3259)	POS(1.01_192.0229)	POS(3.38_572.9133)
POS(1.31_161.974)	POS(0.97_752.7899)	POS(3.66_289.1606)	POS(1.02_114.0649)	POS(3.39_572.7128)
POS(1.32_234.9798)	POS(0.97_760.8219)	POS(3.67_287.0993)	POS(1.02_118.1577)	POS(3.39_703.9587)
POS(1.36_288.977)	POS(0.97_790.6904)	POS(3.68_215.124)	POS(1.02_126.0537)	POS(3.39_704.3595)
POS(1.4_161.0107)	POS(0.97_799.8243)	POS(3.98_97.9407)	POS(1.02_140.1516)	POS(3.39_704.5598)
POS(1.4_212.9752)	POS(0.97_800.7192)	POS(4.02_273.166)	POS(1.02_257.1942)	POS(3.39_715.385)
POS(1.43_99.018)	POS(0.97_808.7511)	POS(4.06_113.9627)	POS(1.02_97.0461)	POS(3.39_715.6389)
POS(1.58_152.0179)	POS(0.97_810.7484)	POS(4.16_139.0053)	POS(1.03_140.1356)	POS(3.39_766.158)
POS(1.61_215.0366)	POS(0.97_828.8087)	POS(4.33_102.012)	POS(1.03_154.0827)	POS(3.39_766.4087)
POS(1.64_136.1346)	POS(0.97_858.6785)	POS(4_175.033)	POS(1.06_140.12)	POS(3.39_766.6593)
POS(1.66_194.116)	POS(0.97_867.8144)	POS(5.07_130.0642)	POS(1.06_142.9468)	POS(3.39_879.4448)
POS(1.97_218.1374)	POS(0.97_868.7069)	POS(5.25_84.9265)	POS(1.06_160.0339)	POS(3.39_879.6954)
POS(1_103.038)	POS(0.97_878.7365)	POS(5.3_112.9783)	POS(1.08_154.0244)	POS(3.41_132.1007)
POS(1_162.1116)	POS(0.97_886.7666)	POS(5.4_96.9362)	POS(1.08_244.0775)	POS(3.41_244.1163)
POS(1_187.0774)	POS(0.97_896.7958)	POS(5.92_112.9418)	POS(1.11_279.0919)	POS(3.41_244.1529)
POS(1_203.1487)	POS(0.97_925.7637)	POS(5.96_216.1477)	POS(1.12_150.9965)	POS(3.41_86.0955)
POS(1_60.0804)	POS(0.97_926.6651)	POS(5.96_236.1601)	POS(1.16_226.896)	POS(3.49_166.0849)
POS(10.01_305.1607)	POS(0.97_936.6934)	POS(7.08_175.1468)	POS(1.19_194.1638)	POS(3.49_187.095)
POS(10.07_349.1396)	POS(0.97_944.7233)	POS(7.25_242.2827)	POS(1.23_306.8521)	POS(3.49_295.1272)
POS(10.09_299.2177)	POS(0.97_946.7239)	POS(7.27_214.2514)	POS(1.24_254.0049)	POS(3.5_114.0902)
POS(10.11_145.1)	POS(0.97_964.7832)	POS(7.33_128.9497)	POS(1.24_267.0573)	POS(3.52_169.0779)
POS(10.11_98.9831)	POS(0.98_120.0022)	POS(7.49_102.0904)	POS(1.26_133.9261)	POS(3.52_182.0562)
POS(10.12_159.1154)	POS(0.98_149.9897)	POS(7.6_195.9724)	POS(1.27_131.9287)	POS(3.52_210.0511)
POS(10.12_327.2126)	POS(0.98_150.0126)	POS(8.03_126.9474)	POS(1.28_166.9157)	POS(3.52_246.1686)
POS(10.12_343.2437)	POS(0.98_206.8927)	POS(8.03_155.0003)	POS(1.31_161.974)	POS(3.52_515.2627)
POS(10.12_387.2698)	POS(0.98_264.8512)	POS(8.03_267.1208)	POS(1.31_169.905)	POS(3.52_60.0804)
POS(10.12_414.2352)	POS(0.98_796.419)	POS(8.03_278.1062)	POS(1.34_193.9281)	POS(3.53_130.1579)
POS(10.13_199.1679)	POS(0.98_96.9209)	POS(8.03_455.1534)	POS(1.35_326.9321)	POS(3.56_245.1844)
POS(10.13_371.2387)	POS(0.98_98.9181)	POS(8.15_172.1683)	POS(1.36_288.977)	POS(3.57_86.0956)
POS(10.15_415.2644)	POS(0.99_104.1061)	POS(8.21_226.1213)	POS(1.37_240.9638)	POS(3.63_188.1419)
POS(10.2_391.1504)	POS(0.99_130.0955)	POS(8.23_116.975)	POS(1.37_267.9518)	POS(4.13_97.9463)
POS(10.22_128.061)	POS(0.99_134.0177)	POS(8.28_277.1783)	POS(1.37_268.9587)	POS(4.15_96.9992)
POS(10.22_143.0843)	POS(0.99_171.1479)	POS(8.34_88.9804)	POS(1.37_283.0307)	POS(4.24_84.9367)
POS(10.25_351.2122)	POS(0.99_173.0285)	POS(8.38_245.0773)	POS(1.37_320.928)	POS(4.45_96.9809)
POS(10.28_159.1154)	POS(0.99_175.0655)	POS(8.4_343.2076)	POS(1.37_580.9846)	POS(4_175.033)
POS(10.28_277.2148)	POS(0.99_175.1176)	POS(8.43_244.6362)	POS(1.38_224.9686)	POS(6.21_96.9385)
POS(10.28_379.1807)	POS(0.99_191.0392)	POS(8.62_268.2619)	POS(1.45_180.0507)	POS(6.44_84.9877)
POS(10.3_316.1851)	POS(0.99_196.8638)	POS(8.71_277.1764)	POS(1.5_276.0885)	POS(6.48_96.9792)
POS(10.33_496.3392)	POS(0.99_219.0242)	POS(8.84_242.2825)	POS(1.5_55.0288)	POS(6.69_96.9482)
POS(10.36_433.1607)	POS(0.99_248.9973)	POS(8.89_209.1273)	POS(1.51_303.9861)	POS(8.28_209.1157)
POS(10.49_391.1502)	POS(0.99_254.8224)	POS(8.89_209.603)	POS(1.53_219.9455)
POS(10.51_318.2385)	POS(0.99_256.8196)	POS(8.89_215.5923)	POS(1.53_237.9707)
POS(10.57_319.1788)	POS(0.99_258.8165)	POS(8.89_275.1742)	POS(1.77_135.029)
POS(10.57_350.2286)	POS(0.99_270.7962)	POS(8.89_292.2009)	POS(1.77_306.0794)
POS(10.58_319.224)	POS(0.99_306.957)	POS(8.89_302.1849)	POS(1.81_137.0448)
POS(10.63_293.2063)	POS(0.99_308.9532)	POS(8.89_348.1202)	POS(1.81_291.0686)
POS(10.63_377.1346)	POS(0.99_312.7807)	POS(8.89_382.2082)	POS(1_102.054)
POS(10.64_339.213)	POS(0.99_314.7778)	POS(8.89_387.2429)	POS(1_102.0904)
POS(10.7_204.1368)	POS(0.99_316.775)	POS(8.89_409.2274)	POS(1_103.069)
POS(10.71_665.4441)	POS(0.99_364.9148)	POS(8.89_460.2111)	POS(1_115.0856)
POS(10.72_235.1677)	POS(0.99_372.7364)	POS(8.89_773.59)	POS(1_116.0696)
POS(10.74_621.4181)	POS(0.99_430.6954)	POS(8.91_292.251)	POS(1_132.1007)
POS(10.77_577.392)	POS(0.99_432.6924)	POS(8.91_382.266)	POS(1_158.1274)
POS(10.8_533.3659)	POS(0.99_548.6103)	POS(8.92_379.1509)	POS(1_162.1791)
POS(10.82_489.3394)	POS(0.99_60.0552)	POS(8.93_376.4022)	POS(1_162.2036)
POS(10.83_512.4126)	POS(0.99_778.4488)	POS(8.96_249.1467)	POS(1_169.9846)
POS(10.84_269.2072)	POS(0.99_780.4454)	POS(8.98_278.1737)	POS(1_172.1066)
POS(10.84_423.3299)	POS(0.99_782.4427)	POS(9.02_414.2994)	POS(1_198.0834)
POS(10.84_445.3131)	POS(0.99_784.4397)	POS(9.27_281.2934)	POS(1_214.0047)
POS(10.84_445.378)	POS(0.99_84.0436)	POS(9.29_402.3561)	POS(1_220.0654)
POS(10.84_468.3854)	POS(1.01_192.0229)	POS(9.3_139.0049)	POS(1_258.1084)
POS(10.85_313.2336)	POS(1.01_203.0514)	POS(9.3_259.1527)	POS(1_271.9633)
POS(10.85_314.3292)	POS(1.01_205.0625)	POS(9.3_275.175)	POS(1_70.0645)
POS(10.86_133.085)	POS(1.02_114.0649)	POS(9.46_184.8837)	POS(2.28_176.9287)
POS(10.86_195.1212)	POS(1.02_118.1577)	POS(9.53_249.1809)	POS(3.49_295.1272)
POS(10.86_313.2856)	POS(1.02_126.0537)	POS(9.56_301.1399)	POS(3.5_187.0437)
POS(10.86_357.2601)	POS(1.02_140.0675)	POS(9.72_275.1989)	POS(3.5_203.0212)
POS(10.86_357.314)	POS(1.02_140.1025)	POS(9.75_293.1907)	POS(3.52_556.277)
POS(10.86_357.3651)	POS(1.02_140.1516)	POS(9.8_299.1811)	POS(5.3_112.9783)
POS(10.86_401.2865)	POS(1.02_204.0859)	POS(9.84_307.1863)	POS(5.79_96.98)
POS(10.86_401.3467)	POS(1.02_213.1558)	POS(9.94_353.161)	POS(6.92_96.9383)
POS(10.86_401.3961)	POS(1.02_257.1942)	POS(9.97_430.3877)	POS(7.27_89.939)
POS(10.86_424.3591)	POS(1.02_58.0647)	POS(9.98_309.3247)	POS(8.89_209.603)
POS(10.86_85.1003)	POS(1.02_59.0725)	POS(9_278.207)
POS(10.86_89.0588)	POS(1.02_96.0775)
POS(10.87_380.334)	POS(1.02_97.0461)
POS(10.88_313.1765)	POS(1.03_132.0756)
POS(10.89_385.1982)	POS(1.03_140.1356)
POS(10.98_277.1781)	POS(1.03_154.0827)
POS(10.99_262.1412)	POS(1.03_90.0541)
POS(10_200.1993)	POS(1.04_146.1164)
POS(11.01_401.2996)	POS(1.04_87.0433)
POS(11.05_219.1727)	POS(1.06_140.12)
POS(11.05_527.2037)	POS(1.06_142.9468)
POS(11.08_347.1605)	POS(1.06_160.0339)
POS(11.08_349.2706)	POS(1.07_116.0695)
POS(11.1_347.2535)	POS(1.08_116.1057)
POS(11.14_361.2328)	POS(1.08_154.0244)
POS(11.18_214.2146)	POS(1.08_203.0169)
POS(11.22_291.2278)	POS(1.08_332.0935)
POS(11.22_301.234)	POS(1.08_70.0645)
POS(11.23_383.2025)	POS(1.1_131.0005)
POS(11.24_191.145)	POS(1.1_144.101)
POS(11.24_301.1898)	POS(1.1_144.1371)
POS(11.24_301.2337)	POS(1.1_144.1665)
POS(11.25_121.0274)	POS(1.1_187.0563)
POS(11.25_149.0222)	POS(1.1_229.1167)
POS(11.25_301.1398)	POS(1.1_257.0728)
POS(11.28_373.1397)	POS(1.1_84.0799)
POS(11.32_175.1111)	POS(1.12_150.9965)
POS(11.32_256.3486)	POS(1.13_180.0051)
POS(11.32_333.1449)	POS(1.15_143.1167)
POS(11.32_347.1605)	POS(1.15_160.1322)
POS(11.33_227.0816)	POS(1.15_60.0804)
POS(11.33_283.1443)	POS(1.16_190.0597)
POS(11.33_339.2074)	POS(1.18_100.0747)
POS(11.33_340.2098)	POS(1.18_132.0651)
POS(11.33_361.1889)	POS(1.18_160.0598)
POS(11.34_228.2306)	POS(1.18_203.1376)
POS(11.34_273.1821)	POS(1.19_158.9953)
POS(11.34_414.2348)	POS(1.19_194.1638)
POS(11.35_300.9908)	POS(1.21_160.1003)
POS(11.36_345.2357)	POS(1.21_186.1109)
POS(11.37_163.111)	POS(1.21_282.118)
POS(11.37_343.1458)	POS(1.23_139.0492)
POS(11.39_399.27)	POS(1.23_155.0439)
POS(11.4_319.2232)	POS(1.23_162.0489)
POS(11.4_355.2443)	POS(1.23_178.0848)
POS(11.4_392.3107)	POS(1.24_254.0049)
POS(11.4_443.2969)	POS(1.24_389.9745)
POS(11.41_227.1995)	POS(1.26_133.9261)
POS(11.42_113.1294)	POS(1.26_262.1269)
POS(11.42_219.1726)	POS(1.28_132.9861)
POS(11.42_311.2177)	POS(1.28_204.2229)
POS(11.42_312.3246)	POS(1.28_269.0728)
POS(11.42_315.1856)	POS(1.28_85.092)
POS(11.42_419.252)	POS(1.29_204.1656)
POS(11.42_84.0807)	POS(1.29_204.2019)
POS(11.44_261.2193)	POS(1.29_85.0673)
POS(11.44_303.3553)	POS(1.32_234.9798)
POS(11.44_321.2012)	POS(1.34_212.9979)
POS(11.44_350.2288)	POS(1.34_375.0098)
POS(11.44_363.157)	POS(1.35_169.0945)
POS(11.44_368.4227)	POS(1.35_326.9321)
POS(11.44_97.9412)	POS(1.36_252.9866)
POS(11.45_347.2544)	POS(1.36_288.977)
POS(11.46_153.1625)	POS(1.37_142.0851)
POS(11.46_321.3698)	POS(1.37_204.1325)
POS(11.48_114.0904)	POS(1.37_211.0028)
POS(11.48_167.1779)	POS(1.37_237.0085)
POS(11.48_254.2464)	POS(1.37_263.9789)
POS(11.48_254.2842)	POS(1.37_320.928)
POS(11.48_338.4382)	POS(1.37_580.9846)
POS(11.48_338.4951)	POS(1.4_126.0551)
POS(11.48_339.4694)	POS(1.4_161.0107)
POS(11.48_353.2642)	POS(1.4_169.0749)
POS(11.48_374.3012)	POS(1.4_212.9752)
POS(11.48_727.4597)	POS(1.42_168.1119)
POS(11.49_162.0797)	POS(1.42_202.1788)
POS(11.49_207.2089)	POS(1.43_99.018)
POS(11.49_226.2151)	POS(1.45_121.0386)
POS(11.49_361.1762)	POS(1.45_210.9756)
POS(11.49_99.1144)	POS(1.45_216.9912)
POS(11.5_111.1158)	POS(1.45_93.0439)
POS(11.5_135.1157)	POS(1.46_177.9911)
POS(11.5_139.1106)	POS(1.5_110.0338)
POS(11.5_139.1469)	POS(1.5_114.9963)
POS(11.5_177.1624)	POS(1.5_133.0307)
POS(11.5_181.1931)	POS(1.5_137.045)
POS(11.5_212.1995)	POS(1.5_196.985)
POS(11.5_240.2308)	POS(1.5_230.1844)
POS(11.5_268.262)	POS(1.5_312.9712)
POS(11.5_283.2226)	POS(1.5_87.0254)
POS(11.5_327.249)	POS(1.51_169.0051)
POS(11.5_340.3478)	POS(1.51_177.0322)
POS(11.5_347.1608)	POS(1.51_179.9981)
POS(11.5_349.2906)	POS(1.51_201.9545)
POS(11.5_360.3221)	POS(1.51_215.0148)
POS(11.5_369.2964)	POS(1.51_241.1531)
POS(11.5_413.3219)	POS(1.51_303.9861)
POS(11.5_415.3005)	POS(1.51_409.0184)
POS(11.5_438.2654)	POS(1.52_132.986)
POS(11.5_683.4335)	POS(1.52_153.0395)
POS(11.51_125.1313)	POS(1.52_170.9861)
POS(11.51_149.1314)	POS(1.52_186.9899)
POS(11.51_170.1527)	POS(1.52_198.9803)
POS(11.51_226.1569)	POS(1.52_230.9799)
POS(11.51_279.2672)	POS(1.52_328.9487)
POS(11.51_371.2749)	POS(1.53_128.9847)
POS(11.51_71.0849)	POS(1.53_313.0102)
POS(11.52_185.1872)	POS(1.58_113.0334)
POS(11.52_237.2559)	POS(1.58_170.011)
POS(11.52_296.3309)	POS(1.59_130.0488)
POS(11.52_338.3409)	POS(1.59_140.0005)
POS(11.52_338.4012)	POS(1.59_144.0223)
POS(11.52_69.0693)	POS(1.59_167.9956)
POS(11.52_85.1003)	POS(1.59_201.978)
POS(11.53_153.1259)	POS(1.59_265.9673)
POS(11.53_193.1933)	POS(1.84_216.0308)
POS(11.53_359.2533)	POS(1.88_170.0111)
POS(11.53_372.1646)	POS(1_102.054)
POS(11.53_392.2581)	POS(1_102.0904)
POS(11.54_221.2245)	POS(1_103.038)
POS(11.54_361.267)	POS(1_103.069)
POS(11.54_639.4072)	POS(1_115.0856)
POS(11.55_321.2398)	POS(1_116.0696)
POS(11.55_343.2209)	POS(1_132.1007)
POS(11.55_511.2936)	POS(1_158.1274)
POS(11.55_590.4255)	POS(1_162.1116)
POS(11.55_83.0848)	POS(1_162.1791)
POS(11.55_97.1002)	POS(1_162.2036)
POS(11.56_170.116)	POS(1_169.9846)
POS(11.56_595.3808)	POS(1_172.1066)
POS(11.57_109.1001)	POS(1_187.0774)
POS(11.57_180.0988)	POS(1_198.0834)
POS(11.57_210.1086)	POS(1_199.9892)
POS(11.57_390.2959)	POS(1_203.1487)
POS(11.57_546.399)	POS(1_214.0047)
POS(11.57_71.0485)	POS(1_220.0654)
POS(11.57_83.0483)	POS(1_258.1084)
POS(11.58_125.0949)	POS(1_271.9633)
POS(11.58_155.1053)	POS(1_365.1649)
POS(11.58_294.2404)	POS(1_60.0804)
POS(11.58_295.1863)	POS(1_70.0645)
POS(11.58_301.0736)	POS(10.86_133.085)
POS(11.58_385.1795)	POS(10.91_84.0866)
POS(11.58_551.3547)	POS(11.25_121.0274)
POS(11.59_167.992)	POS(2.29_149.0437)
POS(11.59_97.9505)	POS(2.3_116.9934)
POS(11.6_128.1059)	POS(2.3_164.9787)
POS(11.6_177.1327)	POS(2.47_320.095)
POS(11.6_224.0548)	POS(2.48_166.0712)
POS(11.6_256.3471)	POS(2.54_222.1949)
POS(11.6_371.1645)	POS(2.68_173.0421)
POS(11.6_502.3729)	POS(2.68_305.0843)
POS(11.6_77.0378)	POS(2.69_194.1045)
POS(11.61_100.9559)	POS(2.71_367.1484)
POS(11.61_359.2061)	POS(2.78_211.1061)
POS(11.61_375.3984)	POS(2.81_149.0048)
POS(11.61_507.3286)	POS(2.87_103.1129)
POS(11.62_232.1679)	POS(2.88_103.0535)
POS(11.62_326.9669)	POS(2.88_107.048)
POS(11.62_419.2756)	POS(2.88_120.08)
POS(11.62_463.302)	POS(2.88_120.1132)
POS(11.62_72.9366)	POS(2.88_120.1411)
POS(11.63_165.089)	POS(2.88_120.1693)
POS(11.63_271.1519)	POS(2.88_176.0122)
POS(11.63_331.2227)	POS(2.88_176.0417)
POS(11.63_333.2335)	POS(2.88_192.1367)
POS(11.63_375.2495)	POS(2.88_204.0317)
POS(11.63_375.3621)	POS(2.88_250.0371)
POS(11.64_287.1988)	POS(2.88_93.069)
POS(11.66_113.9627)	POS(2.88_95.0481)
POS(11.66_450.3176)	POS(2.98_160.0165)
POS(11.66_78.9982)	POS(3.04_252.0712)
POS(11.66_98.9605)	POS(3.04_334.1106)
POS(11.67_365.2278)	POS(3.04_384.1135)
POS(11.68_405.2594)	POS(3.06_217.1032)
POS(11.69_126.9586)	POS(3.06_217.1481)
POS(11.7_139.9868)	POS(3.13_232.1527)
POS(11.7_390.2381)	POS(3.13_279.1322)
POS(11.71_115.9631)	POS(3.15_102.0904)
POS(11.71_124.9619)	POS(3.15_243.1817)
POS(11.71_137.963)	POS(3.15_302.1947)
POS(11.71_335.2542)	POS(3.16_123.1156)
POS(11.71_361.2315)	POS(3.16_424.3042)
POS(11.71_70.9907)	POS(3.16_485.3579)
POS(11.71_90.506)	POS(3.18_136.1109)
POS(11.72_416.3209)	POS(3.18_279.0919)
POS(11.72_95.9524)	POS(3.2_173.0792)
POS(11.73_351.1832)	POS(3.2_232.1528)
POS(11.73_429.2809)	POS(3.23_125.1061)
POS(11.74_144.9811)	POS(3.23_207.109)
POS(11.74_226.9499)	POS(3.23_208.131)
POS(11.74_273.166)	POS(3.29_276.1788)
POS(11.74_335.2174)	POS(3.29_621.1957)
POS(11.74_88.0033)	POS(3.29_621.3209)
POS(11.75_277.2136)	POS(3.29_621.4463)
POS(11.75_357.2)	POS(3.29_621.5715)
POS(11.75_89.0012)	POS(3.29_709.6506)
POS(11.76_341.2645)	POS(3.29_709.7937)
POS(11.76_385.2541)	POS(3.29_710.3661)
POS(11.76_511.2089)	POS(3.29_710.5096)
POS(11.77_315.1848)	POS(3.29_733.2314)
POS(11.77_381.2224)	POS(3.29_827.7563)
POS(11.77_69.9929)	POS(3.31_261.1796)
POS(11.78_345.1456)	POS(3.32_281.0978)
POS(11.78_361.2695)	POS(3.34_117.0399)
POS(11.79_138.0553)	POS(3.34_277.1277)
POS(11.79_187.1171)	POS(3.36_142.1014)
POS(11.79_307.1863)	POS(3.36_146.1396)
POS(11.79_317.2024)	POS(3.36_170.1148)
POS(11.79_391.1872)	POS(3.37_144.1335)
POS(11.8_163.0734)	POS(3.41_244.1529)
POS(11.8_275.2714)	POS(3.47_319.1348)
POS(11.8_279.1936)	POS(3.47_341.1168)
POS(11.8_343.1446)	POS(3.5_163.0329)
POS(11.8_395.2383)	POS(3.5_163.0745)
POS(11.8_425.2136)	POS(3.5_187.0437)
POS(11.8_99.5113)	POS(3.5_349.1821)
POS(11.82_219.1724)	POS(3.5_349.2425)
POS(11.82_270.2773)	POS(3.52_182.0562)
POS(11.83_124.0731)	POS(3.52_279.092)
POS(11.83_135.0018)	POS(3.53_363.1611)
POS(11.83_267.1198)	POS(3.55_393.2082)
POS(11.83_325.1971)	POS(3.56_319.171)
POS(11.83_341.2275)	POS(3.57_407.1874)
POS(11.83_361.1883)	POS(3.63_481.2615)
POS(11.83_363.2899)	POS(3_165.9906)
POS(11.84_293.1344)	POS(8.03_79.0534)
POS(11.84_441.1879)	POS(8.03_91.0533)
POS(11.85_347.2538)	POS(8.03_93.069)
POS(11.86_425.1334)	POS(9.3_113.0586)
POS(11.87_249.1083)	POS(9.3_187.0263)
POS(11.87_450.3176)	POS(9.3_91.0533)
POS(11.87_453.2813)	POS(9.31_119.0977)
POS(11.87_781.5303)
POS(11.88_177.0776)
POS(11.89_138.96)
POS(11.89_281.2934)
POS(11.89_293.282)
POS(11.9_240.2672)
POS(11.9_242.246)
POS(11.9_303.4076)
POS(11.9_441.2981)
POS(11.91_332.3292)
POS(11.91_737.5017)
POS(11.92_172.1115)
POS(11.92_263.1926)
POS(11.92_319.2971)
POS(11.92_359.125)
POS(11.92_376.3166)
POS(11.92_397.328)
POS(11.92_81.0691)
POS(11.92_86.0594)
POS(11.93_119.0844)
POS(11.93_133.0997)
POS(11.93_147.1155)
POS(11.93_151.1468)
POS(11.93_158.1528)
POS(11.93_161.131)
POS(11.93_165.1623)
POS(11.93_175.1466)
POS(11.93_179.1777)
POS(11.93_193.157)
POS(11.93_198.1839)
POS(11.93_220.1305)
POS(11.93_221.2245)
POS(11.93_268.1535)
POS(11.93_280.2624)
POS(11.93_280.3057)
POS(11.93_95.0847)
POS(11.94_151.0698)
POS(11.94_189.0765)
POS(11.94_235.2036)
POS(11.94_246.182)
POS(11.94_265.1045)
POS(11.94_266.1711)
POS(11.94_369.259)
POS(11.94_389.3393)
POS(11.94_425.2858)
POS(11.95_166.1217)
POS(11.95_220.1133)
POS(11.95_259.1148)
POS(11.95_279.1547)
POS(11.95_311.176)
POS(11.95_335.1798)
POS(11.95_399.2125)
POS(11.95_473.3434)
POS(11.95_553.388)
POS(11.95_693.4754)
POS(11.96_273.1298)
POS(11.96_275.157)
POS(11.96_282.2779)
POS(11.96_429.3162)
POS(11.97_124.086)
POS(11.97_169.0783)
POS(11.97_236.1608)
POS(11.97_251.124)
POS(11.97_253.1121)
POS(11.97_439.202)
POS(11.98_223.1454)
POS(11.98_228.2307)
POS(11.98_288.1524)
POS(11.98_297.2386)
POS(11.98_307.1501)
POS(11.98_385.2907)
POS(11.98_419.3166)
POS(11.98_649.4495)
POS(11.99_137.1313)
POS(11.99_152.0808)
POS(11.99_189.078)
POS(11.99_231.1192)
POS(11.99_232.0899)
POS(11.99_233.1504)
POS(11.99_245.1346)
POS(11.99_259.1505)
POS(11.99_293.1705)
POS(11.99_367.3171)
POS(11.99_433.2905)
POS(11_365.1349)
POS(12_107.0595)
POS(12_124.0495)
POS(12_136.0204)
POS(12_136.051)
POS(12_140.1129)
POS(12_149.0816)
POS(12_159.0663)
POS(12_163.0969)
POS(12_166.0972)
POS(12_172.1681)
POS(12_173.0779)
POS(12_173.1308)
POS(12_177.0781)
POS(12_181.1141)
POS(12_200.1992)
POS(12_201.1093)
POS(12_206.1034)
POS(12_206.1391)
POS(12_215.1239)
POS(12_245.0985)
POS(12_256.2629)
POS(12_256.2984)
POS(12_257.1356)
POS(12_265.1395)
POS(12_277.1393)
POS(12_284.2932)
POS(12_287.1477)
POS(12_291.1199)
POS(12_310.3092)
POS(12_311.2539)
POS(12_341.2644)
POS(12_347.2187)
POS(12_348.2852)
POS(12_349.1887)
POS(12_355.2802)
POS(12_363.2877)
POS(12_366.3711)
POS(12_368.3865)
POS(12_389.2636)
POS(12_395.1529)
POS(12_399.3073)
POS(12_406.3259)
POS(12_443.3317)
POS(12_487.3587)
POS(12_517.3707)
POS(12_531.3871)
POS(12_531.4058)
POS(12_537.3947)
POS(12_551.3299)
POS(12_561.3968)
POS(12_587.5479)
POS(12_605.4232)
POS(12_760.584)
POS(2.29_194.9703)
POS(2.3_116.9934)
POS(2.3_164.9787)
POS(2.3_190.9939)
POS(2.47_320.095)
POS(2.48_166.0712)
POS(2.48_188.0528)
POS(2.54_222.1949)
POS(2.62_194.116)
POS(2.68_173.0421)
POS(2.68_305.0843)
POS(2.69_194.1045)
POS(2.7_263.0734)
POS(2.71_247.1071)
POS(2.71_247.1261)
POS(2.71_367.1484)
POS(2.78_211.1061)
POS(2.83_104.0487)
POS(2.83_120.0433)
POS(2.83_150.0546)
POS(2.83_192.0641)
POS(2.86_164.9848)
POS(2.87_103.1129)
POS(2.87_103.1233)
POS(2.88_102.0454)
POS(2.88_103.0535)
POS(2.88_103.0956)
POS(2.88_107.048)
POS(2.88_120.08)
POS(2.88_120.1132)
POS(2.88_120.1411)
POS(2.88_120.1614)
POS(2.88_120.1693)
POS(2.88_166.085)
POS(2.88_176.0122)
POS(2.88_176.0417)
POS(2.88_192.1367)
POS(2.88_204.0317)
POS(2.88_210.0488)
POS(2.88_234.0595)
POS(2.88_250.0371)
POS(2.88_369.1107)
POS(2.88_77.0379)
POS(2.88_79.0534)
POS(2.88_91.0533)
POS(2.88_93.069)
POS(2.88_95.0481)
POS(2.89_120.1319)
POS(2.97_125.0031)
POS(2.98_160.0165)
POS(3.04_180.0866)
POS(3.04_252.0712)
POS(3.04_334.1106)
POS(3.04_384.1135)
POS(3.06_217.1481)
POS(3.1_242.0981)
POS(3.1_90.0541)
POS(3.12_160.0164)
POS(3.13_232.1527)
POS(3.13_279.1322)
POS(3.15_102.0904)
POS(3.15_243.1817)
POS(3.15_302.1947)
POS(3.16_123.1156)
POS(3.16_424.3042)
POS(3.16_485.3579)
POS(3.2_173.0792)
POS(3.2_232.1528)
POS(3.23_125.1061)
POS(3.23_207.109)
POS(3.29_621.1957)
POS(3.29_621.3209)
POS(3.29_621.4463)
POS(3.29_621.5715)
POS(3.29_709.6506)
POS(3.29_709.7937)
POS(3.29_710.3661)
POS(3.29_710.5096)
POS(3.29_733.2314)
POS(3.29_827.7563)
POS(3.31_261.1796)
POS(3.32_162.0402)
POS(3.32_281.0978)
POS(3.35_261.1611)
POS(4.05_307.1142)
POS(4.1_288.2159)
POS(4.15_277.1036)
POS(4.33_245.1022)
POS(4.45_245.1133)
POS(4.49_130.0643)
POS(4.63_96.9993)
POS(5.29_175.0054)
POS(5.57_266.1712)
POS(5.72_167.9925)
POS(5.95_488.2978)
POS(5.96_225.6184)
POS(5.96_234.6238)
POS(5.96_236.1601)
POS(5.96_243.629)
POS(5.96_337.2517)
POS(5.96_412.2841)
POS(6.98_240.2309)
POS(6.98_365.2762)
POS(7.08_175.1468)
POS(7.09_250.1764)
POS(7.25_242.2827)
POS(7.27_214.2514)
POS(7.35_409.2253)
POS(7.42_256.2987)
POS(7.49_102.0904)
POS(7.53_97.0078)
POS(7.6_195.9724)
POS(7.63_77.0378)
POS(7.82_158.0801)
POS(7.82_207.6182)
POS(7.82_217.1565)
POS(7.82_226.6261)
POS(7.82_227.1777)
POS(7.82_235.6315)
POS(7.82_244.6367)
POS(7.82_339.267)
POS(7.82_414.2996)
POS(7.82_414.367)
POS(7.82_414.4069)
POS(7.82_414.4705)
POS(7.82_488.2686)
POS(7.84_271.1866)
POS(7.94_351.1551)
POS(8.01_105.1089)
POS(8.02_121.013)
POS(8.02_233.1148)
POS(8.02_410.3)
POS(8.03_105.0692)
POS(8.03_105.0993)
POS(8.03_105.1148)
POS(8.03_105.1246)
POS(8.03_110.9743)
POS(8.03_118.0641)
POS(8.03_119.0481)
POS(8.03_126.9474)
POS(8.03_127.0378)
POS(8.03_129.0536)
POS(8.03_131.0244)
POS(8.03_137.0586)
POS(8.03_140.9852)
POS(8.03_153.0374)
POS(8.03_155.0003)
POS(8.03_166.0374)
POS(8.03_213.0661)
POS(8.03_218.0774)
POS(8.03_226.0662)
POS(8.03_233.0789)
POS(8.03_267.1208)
POS(8.03_278.1062)
POS(8.03_281.1005)
POS(8.03_286.0951)
POS(8.03_346.1238)
POS(8.03_406.1527)
POS(8.03_409.1615)
POS(8.03_409.2697)
POS(8.03_409.3293)
POS(8.03_412.1693)
POS(8.03_432.2368)
POS(8.03_455.1534)
POS(8.03_471.132)
POS(8.03_77.0379)
POS(8.03_79.0534)
POS(8.03_81.0328)
POS(8.03_91.0533)
POS(8.03_93.009)
POS(8.03_93.069)
POS(8.03_97.0275)
POS(8.03_98.0192)
POS(8.03_98.9744)
POS(8.04_105.1353)
POS(8.04_105.1496)
POS(8.04_131.0496)
POS(8.04_409.2274)
POS(8.06_409.3026)
POS(8.15_172.1683)
POS(8.21_226.1213)
POS(8.26_157.0998)
POS(8.26_351.1552)
POS(8.28_209.1157)
POS(8.32_299.1814)
POS(8.38_245.0773)
POS(8.4_343.2076)
POS(8.44_131.0842)
POS(8.44_142.0763)
POS(8.44_157.0999)
POS(8.44_351.1553)
POS(8.44_409.2276)
POS(8.62_268.2619)
POS(8.63_304.3566)
POS(8.66_98.9831)
POS(8.71_277.1764)
POS(8.8_249.1104)
POS(8.81_407.1452)
POS(8.84_242.2825)
POS(8.89_199.6171)
POS(8.89_207.606)
POS(8.89_207.6493)
POS(8.89_207.6836)
POS(8.89_207.7206)
POS(8.89_208.1433)
POS(8.89_215.5923)
POS(8.89_219.1117)
POS(8.89_275.1742)
POS(8.89_292.2009)
POS(8.89_348.1202)
POS(8.89_376.153)
POS(8.89_376.3231)
POS(8.89_376.4771)
POS(8.89_395.2319)
POS(8.89_398.2407)
POS(8.89_398.3069)
POS(8.89_398.3468)
POS(8.89_398.4079)
POS(8.89_399.4067)
POS(8.89_421.3161)
POS(8.89_460.2111)
POS(8.89_773.59)
POS(8.89_773.6436)
POS(8.91_292.251)
POS(8.91_382.266)
POS(8.92_379.1509)
POS(8.93_376.4022)
POS(9.05_363.1553)
POS(9.05_407.1452)
POS(9.11_365.1703)
POS(9.12_143.0842)
POS(9.27_281.2934)
POS(9.29_307.0839)
POS(9.29_402.3561)
POS(9.3_113.0586)
POS(9.3_119.0483)
POS(9.3_127.0054)
POS(9.3_187.0263)
POS(9.3_267.1212)
POS(9.3_278.1049)
POS(9.3_286.095)
POS(9.3_346.1236)
POS(9.3_406.1533)
POS(9.3_409.1614)
POS(9.3_409.2264)
POS(9.3_409.27)
POS(9.3_409.3277)
POS(9.3_471.1317)
POS(9.3_795.3347)
POS(9.3_91.0533)
POS(9.3_93.0689)
POS(9.3_95.0482)
POS(9.31_119.0977)
POS(9.32_119.1101)
POS(9.36_337.2333)
POS(9.46_337.2334)
POS(9.46_363.1555)
POS(9.49_332.3297)
POS(9.53_249.1809)
POS(9.54_96.9669)
POS(9.56_301.1399)
POS(9.56_349.1395)
POS(9.56_357.2775)
POS(9.56_393.1656)
POS(9.68_379.2098)
POS(9.68_91.0533)
POS(9.68_98.9757)
POS(9.69_379.1507)
POS(9.72_365.1698)
POS(9.78_326.377)
POS(9.8_299.1811)
POS(9.84_307.1863)
POS(9.88_298.3454)
POS(9.88_520.3394)
POS(9.89_221.1155)
POS(9.89_379.1505)
POS(9.92_211.0988)
POS(9.94_353.161)
POS(9.97_430.3877)
POS(9_278.207)
